# Supplementary material for: Cortical and subcortical neuroanatomical signatures of schizotypy in 3004 individuals assessed in a worldwide ENIGMA study
Source: PubMed Central journal article supplement (PMC9054674; doi:10.1038/s41380-021-01359-9), 2021-10-27
Supplement: 41380_2021_1359_MOESM1_ESM.pdf [file 41380_2021_1359_MOESM1_ESM.pdf]

# Cortical and Subcortical Neuroanatomical Signatures of Schizotypy in 3,004 Individuals Assessed in a Worldwide ENIGMA Study

Kirschner and Hodzic-Santor et al.

## Supplement

---

## Index

### Supplementary Figures

- Figure S1: Location of Enigma Schizotypy Working Group Members

### Supplementary Methods

### Site Information and Demographics

- Table S1: Demographics Cortical Meta-Analysis
- Table S2: Demographics Subcortical Meta-Analysis
- Table S3: Schizotypy Scales
- Table S4: Mean Cortical Thickness and Surface Area
- Table S5: Mean Subcortical Volume
- Table S6: Scanner Details

### Meta-analyses

- Table S7: Cortical Thickness Continuous Model - No Thickness Covariate
- Table S8: Cortical Surface Area Continuous Model - No Surface Area Covariate
- Table S9: Effect of Schizotypy in Subgroup with Smoking Data
- Table S10: Effect of Schizotypy Controlling for Smoking Status
- Table S11: Effect of Schizotypy in Subgroup with Smoking Data
- Table S12: Effect of Schizotypy Controlling for Smoking Status
- Table S13: Schizotypy Questionnaire Moderator
- Table S14: Scanner Field Strength Moderator
- Table S15: Scanner Number Moderator
- Table S16: FreeSurfer Version Moderator
- Table S17: Cortical Thickness Continuous Model
- Table S18: Cortical Surface Area Continuous Model
- Table S19: Subcortical Correlation Model

### Funding and Acknowledgments

## Supplementary Figures

Figure S1: Location of Enigma Schizotypy Working Group Members

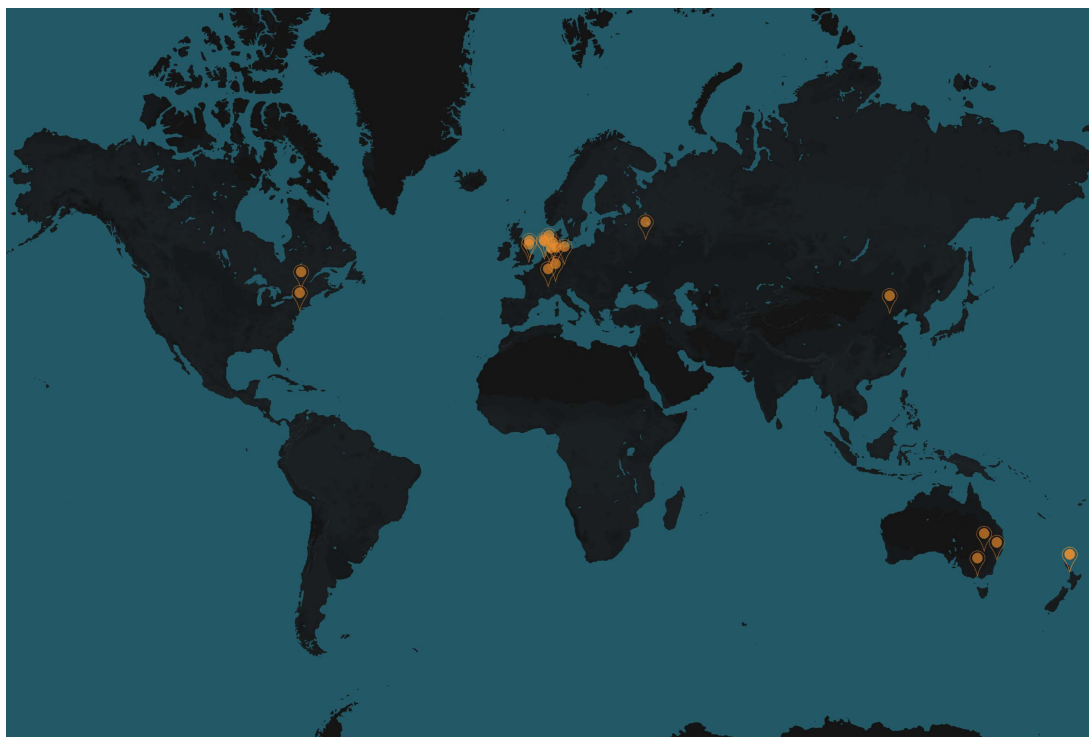

Location of Enigma Schizotypy Working Group Members

## Supplementary Methods

### Site Demographics & Information

Table S1: Demographics Cortical Meta-Analysis

| Site       | N   | Scale    | Female/Male | Mean Age | Age S.D. | Age Range   | Mean SPT score | Score S.D. | Score range |
|------------|-----|----------|-------------|----------|----------|-------------|----------------|------------|-------------|
| AMS        | 49  | CAPE     | 23/26       | 21.36    | 3.08     | 16.18-32.24 | 64.33          | 10.19      | 46-86       |
| ASRB       | 191 | SPQ      | 91/100      | 39.69    | 13.77    | 18-65       | 10.24          | 9.11       | 0-43        |
| AUK        | 49  | OLIFE    | 32/17       | 23.33    | 4.5      | 18-38       | 42.71          | 17.85      | 10-81       |
| BEI        | 146 | SPQ      | 77/69       | 19.57    | 1.08     | 16-24       | 23.19          | 12.67      | 2-53        |
| BONNOLIFE  | 31  | OLIFE    | 13/18       | 23.61    | 4.52     | 19-43       | 11.48          | 8.04       | 1-24        |
| BONNRISC   | 51  | RISC     | 18/33       | 27.2     | 5.36     | 19-40       | 22.37          | 7.71       | 2-34        |
| BONNSPQ    | 92  | SPQ      | 46/46       | 28.16    | 8.01     | 19-50       | 8.4            | 7.19       | 0-35        |
| CAM        | 89  | SPQ      | 48/41       | 24.07    | 5.3      | 1-41        | 16.17          | 10.13      | 0-43        |
| DECOP      | 26  | CAPE     | 09/17       | 38.62    | 7.34     | 28-54       | 66.73          | 12.78      | 50-101      |
| FOR2107-MR | 446 | SPQB     | 279/167     | 34.67    | 12.85    | 18-65       | 3.49           | 3.02       | 0-16        |
| FOR2107-MS | 228 | SPQB     | 146/82      | 28.42    | 10.41    | 18-65       | 3.04           | 2.96       | 0-16        |
| GENEVA     | 118 | SPQ      | 58/60       | 17.02    | 4.22     | 12.06-33.76 | 19.6           | 12.54      | 1-57        |
| GRON1      | 42  | SPQ      | 16/26       | 22.67    | 2.26     | 18-27       | 33.64          | 5.22       | 25-44       |
| GRON2      | 83  | CAPE-Adj | 47/36       | 32.43    | 9.53     | 19-55       | 0.96           | 1.29       | 0-4.12      |
| IGPS       | 63  | SPQ      | 28/35       | 36.43    | 11.05    | 20.15-59.03 | 12.21          | 11.12      | 0-46        |

| Site           | N           | Scale    | Female/Male          | Mean Age     | Age S.D.   | Age Range          | Mean SPT score | Score S.D. | Score range |
|----------------|-------------|----------|----------------------|--------------|------------|--------------------|----------------|------------|-------------|
| JENA           | 115         | SPQ      | 60/55                | 29.37        | 9.65       | 20-60              | 10.76          | 8.21       | 0-49        |
| LOND1a         | 46          | OLIFE    | 22/24                | 27.46        | 6.84       | 18-44              | 26.52          | 15.48      | 4-58        |
| LOND1b         | 40          | CAPE     | 19/21                | 20.8         | 3.76       | 18-39              | 1.44           | 0.34       | 1-2.15      |
| LOND5          | 44          | SPQ      | 32/12                | 20.09        | 1.7        | 18-27              | 26.55          | 20.54      | 0-63        |
| LOND3          | 40          | SPQ      | 16/24                | 30.97        | 10.87      | 19-51              | 7.86           | 5.12       | 0-19        |
| MELB           | 392         | CAPE     | 224/168              | 23.38        | 5.17       | 18-50              | 25.43          | 4          | 20-38       |
| MTL            | 40          | CHAP     | 27/13                | 19.82        | 1.14       | 18.1-22.8          | 24.73          | 14.41      | 4-55        |
| MOS            | 33          | SPQ      | 16/17                | 23.83        | 3.35       | 18.1-30.1          | 15             | 11.84      | 1-45        |
| MNC            | 173         | SPQB     | 92/81                | 43.31        | 11.85      | 18-64              | 3.34           | 3.08       | 0-21        |
| NYC            | 225         | CAPE-Adj | 110/115              | 35.92        | 12.85      | 18.47-68.04        | 1.14           | 0.16       | 1-1.84      |
| UTR            | 97          | SPQ      | 62/35                | 41.26        | 14.26      | 18-65              | 17.62          | 14.29      | 0-57        |
| ZUR1           | 27          | SPQ      | 10/17                | 29.15        | 10.35      | 19-48              | 42.56          | 7.06       | 34-60       |
| ZUR2           | 62          | SPQ      | 0/62                 | 27.74        | 4.74       | 20-38              | 18.5           | 10.9       | 2-46        |
| <b>Overall</b> | <b>3038</b> |          | <b>560.01/247.25</b> | <b>29.89</b> | <b>4.3</b> | <b>12.06-67.78</b> |                |            |             |

Table S2: Demographics Subcortical Meta-Analysis

| Site       | N   | Scale    | Female/Male | Mean Age | Age S.D. | Age Range   | Mean SPT score | Score S.D. | Score range |
|------------|-----|----------|-------------|----------|----------|-------------|----------------|------------|-------------|
| AMS        | 49  | CAPE     | 23/26       | 21.36    | 3.08     | 16.18-32.24 | 64.33          | 10.19      | 46-86       |
| ASRB       | 191 | SPQ      | 100/91      | 39.69    | 13.77    | 18-65       | 10.24          | 9.11       | 0-43        |
| AUK        | 49  | OLIFE    | 32/17       | 23.33    | 4.5      | 18-38       | 42.71          | 17.85      | 10-81       |
| BEI        | 146 | SPQ      | 77/69       | 19.57    | 1.08     | 16-24       | 23.19          | 12.67      | 2-53        |
| BONNOLIFE  | 31  | OLIFE    | 13/18       | 23.61    | 4.52     | 19-43       | 11.48          | 8.04       | 1-24        |
| BONNRISC   | 55  | RISC     | 18/37       | 26.73    | 5.5      | 18-40       | 22.35          | 7.59       | 2-34        |
| BONNSPQ    | 118 | SPQ      | 58/60       | 27.18    | 7.92     | 18-50       | 8.29           | 7.04       | 0-35        |
| CAM        | 89  | SPQ      | 48/41       | 24.29    | 4.7      | 18-41       | 16.17          | 10.13      | 0-43        |
| DECOP      | 26  | CAPE     | 9/17        | 38.62    | 7.34     | 28-54       | 66.73          | 12.78      | 50-101      |
| FOR2107-MR | 446 | SPQB     | 279/167     | 34.67    | 12.85    | 18-65       | 3.49           | 3.02       | 0-16        |
| FOR2107-MS | 228 | SPQB     | 146/82      | 28.42    | 10.41    | 18-65       | 3.04           | 2.96       | 0-16        |
| GENEVA     | 118 | SPQ      | 58/60       | 17.02    | 4.22     | 12.06-33.76 | 19.6           | 12.54      | 1-57        |
| GRON1      | 42  | SPQ      | 16/26       | 22.67    | 2.26     | 18-27       | 33.64          | 5.22       | 25-44       |
| GRON2      | 38  | CAPE-Adj | 19/19       | 36.61    | 9.42     | 20-53       | 1.74           | 1.29       | 0-4.05      |
| IGPS       | 63  | SPQ      | 28/35       | 36.43    | 11.05    | 20.15-59.03 | 12.21          | 11.12      | 0-46        |
| JENA       | 115 | SPQ      | 60/55       | 29.37    | 9.65     | 20-60       | 10.76          | 8.21       | 0-49        |

| Site           | N           | Scale    | Female/Male          | Mean Age    | Age S.D.    | Age Range          | Mean SPT score | Score S.D. | Score range |
|----------------|-------------|----------|----------------------|-------------|-------------|--------------------|----------------|------------|-------------|
| LOND1a         | 46          | OLIFE    | 22/24                | 27.46       | 6.84        | 18-44              | 26.52          | 15.48      | 4-58        |
| LOND1b         | 40          | CAPE     | 19/21                | 20.8        | 3.76        | 18-39              | 1.44           | 0.34       | 1-2.15      |
| LOND3          | 40          | SPQ      | 16/24                | 30.97       | 10.87       | 19-51              | 7.86           | 5.12       | 0-19        |
| LOND5          | 30          | SPQ      | 22/8                 | 19.73       | 1.31        | 18-23              | 27.03          | 20.55      | 0-57        |
| MELB           | 387         | CAPE     | 221/166              | 23.38       | 5.15        | 18-50              | 25.38          | 3.92       | 20-38       |
| MTL            | 40          | CHAP     | 27/13                | 19.92       | 1.21        | 18-23              | 24.73          | 14.41      | 4-55        |
| MOS            | 33          | SPQ      | 16/17                | 23.83       | 3.35        | 18.1-30.1          | 15             | 11.84      | 1-45        |
| MNC            | 173         | SPQB     | 92/81                | 43.31       | 11.85       | 18-64              | 3.34           | 3.08       | 0-21        |
| NYC            | 225         | CAPE-Adj | 110/115              | 35.92       | 12.85       | 18.47-68.04        | 1.14           | 0.16       | 1-1.84      |
| UTR            | 97          | SPQ      | 62/35                | 41.26       | 14.26       | 18-65              | 17.62          | 14.29      | 0-57        |
| ZUR1           | 27          | SPQ      | 10/17                | 29.15       | 10.35       | 19-48              | 42.56          | 7.06       | 34-60       |
| ZUR2           | 62          | SPQ      | 0/62                 | 27.74       | 4.74        | 20-38              | 18.5           | 10.9       | 2-46        |
| <b>Overall</b> | <b>3004</b> |          | <b>561.09/246.91</b> | <b>29.9</b> | <b>4.31</b> | <b>12.06-67.78</b> |                |            |             |

Table S3: Schizotypy Scales

| Questionnaires | Total number of items | Factors/Subscales                                                                                      |
|----------------|-----------------------|--------------------------------------------------------------------------------------------------------|
| SPQ            | 74                    | Cognitive/Perceptual; Interpersonal; Disorganized                                                      |
| SPQ-B          | 22                    | Cognitive/Perceptual; Interpersonal; Disorganized                                                      |
| CAPE           | 42                    | Depression, Negative, Positive Symptoms                                                                |
| OLIFE          | 104                   | Unusual Experiences; Cognitive Disorganization; Introvertive Anhedonia; Impulsive Nonconformity        |
| RISC           | 26                    | Positive and Cognitive content of schizotypy                                                           |
| CHAP           | 196                   | Perceptual Aberration; Magical Ideation; Physical Anhedonia; Social Anhedonia; Impulsive Nonconformity |

<sup>a</sup> Note. CHAP=Chapman scales; CAPE=Community Assessment of Psychotic Experiences; Schizotypal Personality Questionnaire=SPQ; OLIFE=Oxford-Liverpool Inventory of Feelings and Experiences; RISC=Rust Inventory of Schizotypal Cognitions.

Table S4: Mean Cortical Thickness and Surface Area

| Region                    | N    | Thickness |      |      |      | Surface |         |       |      |      |
|---------------------------|------|-----------|------|------|------|---------|---------|-------|------|------|
|                           |      | Mean      | S.D. | Min  | Max  | N       | Mean    | S.D.  | Min  | Max  |
| L_bankssts                | 2788 | 2.54      | 0.09 | 1.93 | 2.66 | 2824    | 1053.87 | 50.74 | 495  | 1299 |
| L_caudalanteriorcingulate | 2943 | 2.75      | 0.12 | 1.97 | 2.71 | 2979    | 662.19  | 31.27 | 312  | 744  |
| L_caudalmiddlefrontal     | 2945 | 2.63      | 0.08 | 2    | 2.68 | 2981    | 2362.07 | 90.72 | 1252 | 2957 |
| L_cuneus                  | 2815 | 1.89      | 0.09 | 1.28 | 1.75 | 2851    | 1534.11 | 79.68 | 700  | 1734 |

| Region                     | Thickness |      |      |      |      | Surface |         |        |      |      |
|----------------------------|-----------|------|------|------|------|---------|---------|--------|------|------|
|                            | N         | Mean | S.D. | Min  | Max  | N       | Mean    | S.D.   | Min  | Max  |
| L_entorhinal               | 2781      | 3.3  | 0.19 | 1.87 | 3.46 | 2816    | 443.49  | 36.78  | 207  | 586  |
| L_fusiform                 | 2911      | 2.74 | 0.13 | 1.97 | 2.67 | 2947    | 3301.29 | 179.12 | 1811 | 3997 |
| L_inferiorparietal         | 2856      | 2.51 | 0.08 | 1.91 | 2.4  | 2892    | 4694.9  | 186.41 | 2377 | 5829 |
| L_inferiortemporal         | 2882      | 2.82 | 0.17 | 2    | 2.65 | 2918    | 3480.87 | 243.74 | 1581 | 4170 |
| L_isthmuscingulate         | 2957      | 2.53 | 0.11 | 1.79 | 2.55 | 2993    | 1028.75 | 38.47  | 587  | 1258 |
| L_lateraloccipital         | 2915      | 2.22 | 0.11 | 1.5  | 1.95 | 2951    | 5041    | 319.83 | 3310 | 5992 |
| L_lateralorbitofrontal     | 2931      | 2.7  | 0.09 | 2.1  | 2.81 | 2967    | 2737.12 | 119.92 | 1446 | 3118 |
| L_lingual                  | 2894      | 2.04 | 0.09 | 1.41 | 1.92 | 2930    | 3141.08 | 163.91 | 1571 | 3487 |
| L_medialorbitofrontal      | 2915      | 2.48 | 0.11 | 1.86 | 2.45 | 2951    | 1896.48 | 107.96 | 1064 | 2248 |
| L_middletemporal           | 2780      | 2.93 | 0.14 | 2.11 | 2.94 | 2816    | 3229.17 | 195.65 | 1725 | 3904 |
| L parahippocampal          | 2942      | 2.83 | 0.12 | 1.62 | 2.95 | 2977    | 708.66  | 36.88  | 432  | 828  |
| L_paracentral              | 2954      | 2.45 | 0.1  | 1.81 | 2.26 | 2990    | 1370.63 | 54.69  | 806  | 1586 |
| L_parsopercularis          | 2931      | 2.67 | 0.09 | 1.63 | 2.65 | 2967    | 1694.64 | 59.98  | 1032 | 1970 |
| L_parsorbitalis            | 2935      | 2.8  | 0.11 | 1.89 | 2.71 | 2971    | 677.84  | 49.49  | 396  | 781  |
| L_parstriangularis         | 2920      | 2.54 | 0.09 | 1.33 | 2.57 | 2956    | 1342.39 | 64.32  | 691  | 1718 |
| L_pericalcarine            | 2868      | 1.63 | 0.11 | 1.09 | 1.58 | 2904    | 1428.78 | 77.26  | 776  | 1726 |
| L_postcentral              | 2889      | 2.13 | 0.06 | 1.72 | 2.03 | 2925    | 4229.85 | 161.74 | 2762 | 4920 |
| L_posteriorcingulate       | 2956      | 2.59 | 0.1  | 1.92 | 2.52 | 2990    | 1209.35 | 41.41  | 741  | 1469 |
| L_precentral               | 2910      | 2.63 | 0.1  | 1.95 | 2.57 | 2945    | 4913.82 | 215.13 | 3315 | 5822 |
| L_precuneus                | 2942      | 2.44 | 0.08 | 1.88 | 2.37 | 2978    | 3881.81 | 139.88 | 2551 | 4795 |
| L_rostralanteriorcingulate | 2929      | 2.94 | 0.12 | 1.96 | 2.94 | 2965    | 862.72  | 30.94  | 344  | 1129 |
| L_rostralmiddlefrontal     | 2936      | 2.44 | 0.1  | 1.89 | 2.41 | 2972    | 5902.13 | 294.36 | 3692 | 6981 |
| L_superiorfrontal          | 2936      | 2.82 | 0.1  | 2.14 | 2.67 | 2971    | 7446.57 | 313.1  | 4887 | 8644 |
| L_superiorparietal         | 2895      | 2.24 | 0.07 | 1.65 | 2.18 | 2931    | 5524.96 | 194.19 | 3462 | 6325 |
| L_superiortemporal         | 2767      | 2.87 | 0.11 | 2.25 | 3.04 | 2804    | 3920.64 | 182.28 | 2326 | 4589 |
| L_supramarginal            | 2802      | 2.62 | 0.09 | 1.98 | 2.59 | 2838    | 4056.47 | 227.54 | 2192 | 4949 |
| L_frontalpole              | 2962      | 2.85 | 0.14 | 1.66 | 3.01 | 2998    | 233.95  | 28.24  | 110  | 266  |
| L_temporalpole             | 2911      | 3.58 | 0.22 | 1.77 | 3.8  | 2946    | 481.69  | 21.75  | 253  | 577  |
| L_transversetemporal       | 2962      | 2.43 | 0.13 | 1.37 | 2.37 | 2998    | 466.68  | 21.39  | 273  | 587  |
| L_insula                   | 2889      | 3.1  | 0.11 | 2.31 | 2.99 | 2925    | 2328.64 | 139.5  | 1462 | 2466 |
| R_bankssts                 | 2893      | 2.66 | 0.1  | 1.71 | 2.71 | 2929    | 957.45  | 54.15  | 542  | 1132 |
| R_caudalanteriorcingulate  | 2954      | 2.6  | 0.11 | 1.81 | 2.71 | 2989    | 770.34  | 40.67  | 329  | 978  |
| R_caudalmiddlefrontal      | 2938      | 2.59 | 0.09 | 1.96 | 2.68 | 2974    | 2205.54 | 111.71 | 1188 | 2674 |

| Region                     | Thickness |      |      |      |      | Surface |         |        |      |      |
|----------------------------|-----------|------|------|------|------|---------|---------|--------|------|------|
|                            | N         | Mean | S.D. | Min  | Max  | N       | Mean    | S.D.   | Min  | Max  |
| R_cuneus                   | 2840      | 1.92 | 0.09 | 1.3  | 1.85 | 2876    | 1586.95 | 82.89  | 560  | 1931 |
| R_entorhinal               | 2702      | 3.43 | 0.19 | 2.1  | 3.5  | 2736    | 388     | 32.51  | 114  | 477  |
| R_fusiform                 | 2918      | 2.76 | 0.15 | 1.82 | 2.71 | 2954    | 3227.61 | 166.49 | 1883 | 3809 |
| R_inferiorparietal         | 2854      | 2.55 | 0.09 | 1.95 | 2.56 | 2891    | 5557.38 | 241.94 | 3172 | 6593 |
| R_inferiortemporal         | 2892      | 2.84 | 0.18 | 1.65 | 2.79 | 2928    | 3325.58 | 221.94 | 1412 | 4042 |
| R_isthmuscingulate         | 2946      | 2.51 | 0.09 | 1.86 | 2.6  | 2981    | 937.19  | 29.27  | 530  | 1146 |
| R_lateraloccipital         | 2909      | 2.28 | 0.12 | 1.52 | 2.13 | 2945    | 4946.39 | 333.68 | 2909 | 5814 |
| R_lateralorbitofrontal     | 2907      | 2.66 | 0.1  | 1.94 | 2.58 | 2943    | 2701.92 | 138.52 | 1519 | 3259 |
| R_lingual                  | 2895      | 2.08 | 0.09 | 1.55 | 2.01 | 2931    | 3194.39 | 165.49 | 1816 | 3708 |
| R_medialorbitofrontal      | 2895      | 2.47 | 0.12 | 1.83 | 2.49 | 2930    | 1916.35 | 100.58 | 1090 | 2242 |
| R_middletemporal           | 2864      | 2.96 | 0.13 | 2.06 | 2.95 | 2902    | 3560.95 | 195.57 | 2133 | 4085 |
| R parahippocampal          | 2944      | 2.79 | 0.12 | 1.91 | 2.92 | 2980    | 685.3   | 41.3   | 341  | 797  |
| R_paracentral              | 2951      | 2.47 | 0.11 | 1.85 | 2.29 | 2987    | 1545.79 | 63.41  | 987  | 1723 |
| R_parsopercularis          | 2908      | 2.66 | 0.08 | 2.03 | 2.64 | 2944    | 1423.51 | 55.76  | 829  | 1690 |
| R_parsorbitalis            | 2933      | 2.77 | 0.1  | 1.65 | 2.79 | 2969    | 828.11  | 47.05  | 510  | 1008 |
| R_parsotriangularis        | 2899      | 2.52 | 0.09 | 1.85 | 2.5  | 2935    | 1544.28 | 75.87  | 895  | 1800 |
| R_pericalcarine            | 2850      | 1.63 | 0.11 | 1.12 | 1.56 | 2886    | 1564.36 | 80.51  | 692  | 1855 |
| R_postcentral              | 2904      | 2.1  | 0.06 | 1.69 | 2.14 | 2941    | 4068.26 | 152.31 | 2493 | 4747 |
| R_posteriorcingulate       | 2957      | 2.56 | 0.09 | 1.95 | 2.59 | 2991    | 1232.3  | 46.22  | 702  | 1457 |
| R_precentral               | 2908      | 2.58 | 0.09 | 1.94 | 2.54 | 2944    | 4950.88 | 209.46 | 3359 | 5707 |
| R_precuneus                | 2941      | 2.45 | 0.08 | 1.88 | 2.42 | 2977    | 4059.22 | 153.04 | 2584 | 4856 |
| R_rostralanteriorcingulate | 2904      | 2.91 | 0.12 | 1.94 | 3.05 | 2940    | 672.22  | 49.95  | 273  | 797  |
| R_rostralmiddlefrontal     | 2914      | 2.37 | 0.11 | 1.88 | 2.26 | 2950    | 6094.3  | 304.84 | 3918 | 7580 |
| R_superiorfrontal          | 2935      | 2.78 | 0.1  | 2.13 | 2.73 | 2971    | 7218.26 | 305.46 | 4387 | 7915 |
| R_superiorparietal         | 2911      | 2.23 | 0.07 | 1.71 | 2.17 | 2947    | 5501.62 | 204.91 | 3317 | 6671 |
| R_superiortemporal         | 2842      | 2.9  | 0.1  | 2.19 | 2.96 | 2878    | 3705.84 | 162.91 | 2382 | 4175 |
| R_supramarginal            | 2829      | 2.63 | 0.09 | 1.98 | 2.57 | 2865    | 3770.22 | 144.57 | 2139 | 4604 |
| R_frontalpole              | 2953      | 2.8  | 0.14 | 1.57 | 2.95 | 2988    | 301.61  | 21.78  | 140  | 367  |
| R_temporalpole             | 2848      | 3.67 | 0.24 | 1.75 | 4    | 2884    | 442.52  | 27.47  | 204  | 538  |
| R_transversetemporal       | 2965      | 2.46 | 0.15 | 1.42 | 2.46 | 3001    | 350.23  | 16.54  | 167  | 425  |
| R_insula                   | 2856      | 3.08 | 0.13 | 2.31 | 3.03 | 2892    | 2331.06 | 106.23 | 1449 | 2653 |
| LThickness                 | 2967      | 2.54 | 0.08 | 2.08 | 2.36 | 3003    | 12.71   | 48.22  | 2.08 | 2.36 |
| RThickness                 | 2967      | 2.54 | 0.08 | 2.04 | 2.4  | 3003    | 13.31   | 46.87  | 2.04 | 2.4  |

| Region    | Thickness |          |         |         |         | Surface |          |         |         |         |
|-----------|-----------|----------|---------|---------|---------|---------|----------|---------|---------|---------|
|           | N         | Mean     | S.D.    | Min     | Max     | N       | Mean     | S.D.    | Min     | Max     |
| LSurfArea | 2967      | 87267.07 | 3148.57 | 59365.8 | 97806.3 | 3003    | 87333.3  | 3265.94 | 59365.8 | 97806.3 |
| RSurfArea | 2967      | 87544.61 | 3106.6  | 59252   | 96576.2 | 3003    | 87608.73 | 3224.42 | 59252   | 96576.2 |

Table S5: Mean Subcortical Volume

| Region   | N    | Mean       | S.D.     | Min       | Max        |
|----------|------|------------|----------|-----------|------------|
| LLatVent | 2997 | 7456.26    | 1053.33  | 1369.30   | 10534.10   |
| RLatVent | 2997 | 6978.64    | 1023.95  | 1264.90   | 12906.20   |
| Lthal    | 2973 | 7953.10    | 482.56   | 4685.70   | 8519.10    |
| Lcaud    | 2988 | 3761.75    | 197.85   | 2036.90   | 4058.80    |
| Lput     | 2941 | 5478.50    | 458.59   | 2175.20   | 4843.50    |
| Lpal     | 2769 | 1748.65    | 299.01   | 419.10    | 982.60     |
| Lhippo   | 2977 | 4291.68    | 238.80   | 2098.30   | 4625.80    |
| Lamyg    | 2979 | 1673.98    | 100.81   | 1044.40   | 1778.70    |
| Laccumb  | 2972 | 592.75     | 169.58   | 141.20    | 409.60     |
| Rthal    | 2993 | 7357.46    | 572.20   | 2729.20   | 4381.60    |
| Rcaud    | 2989 | 3796.49    | 269.10   | 1447.00   | 2487.30    |
| Rput     | 2972 | 5309.39    | 564.15   | 1125.50   | 1922.70    |
| Rpal     | 2977 | 1814.57    | 670.70   | 723.00    | 2003.20    |
| Rhippo   | 2985 | 4407.02    | 226.90   | 2484.00   | 4867.30    |
| Ramyg    | 2967 | 1789.44    | 284.99   | 1074.00   | 2024.30    |
| Raccumb  | 2970 | 610.73     | 65.95    | 260.70    | 637.50     |
| Mvent    | 2996 | 7212.76    | 1027.45  | 1471.70   | 11361.40   |
| Mthal    | 2970 | 7655.74    | 459.63   | 4568.80   | 6598.60    |
| Mcaud    | 2981 | 3777.99    | 141.06   | 2185.80   | 4088.90    |
| Mput     | 2927 | 5391.41    | 485.77   | 1994.60   | 3327.75    |
| Mpal     | 2764 | 1792.46    | 350.06   | 833.05    | 1930.80    |
| Mhippo   | 2973 | 4349.02    | 217.64   | 2627.85   | 4689.60    |
| Mamyg    | 2957 | 1730.82    | 175.00   | 1113.55   | 1908.60    |
| Maccumb  | 2951 | 601.66     | 103.30   | 231.25    | 507.95     |
| ICV      | 2999 | 1533873.22 | 68257.29 | 769523.00 | 1710000.00 |

Table S6: Scanner Details

| Sample Abbreviation | Sample Name | Number of Scanners | Scanner Type                                        | Imaging protocols                                                                                                                                                                                                               | Slice Orientation    | FreeSurfer Version | Operating System                                     |
|---------------------|-------------|--------------------|-----------------------------------------------------|---------------------------------------------------------------------------------------------------------------------------------------------------------------------------------------------------------------------------------|----------------------|--------------------|------------------------------------------------------|
| AMS                 | Amsterdam   | 1                  | 3T Phillips Achieva                                 | 3D T1-weighted images (TR = 8.2, TE = 3.8, FA = 8°, FOV 240 × 188 mm, voxel size 1 × 1 × 1, 220 slices)                                                                                                                         | sequential ascending | 6.0.1              | Virtual linux environmer (singularity on HPC)        |
| ASRB                | Sydney 1    | 5                  | 1.5T Siemens Avanto                                 | 3D MPRAGE; TR 1980ms, TE 4.3ms, field-of-view 250 x 250 mm2, data acquisition matrix 256 x 256, 176 contiguous 1mm slices; voxel size 0.98 x 0.98 x 1.0 mm3, flip angle 15°                                                     | sagittal             | 5.1                | Mac OS X 10.9.5                                      |
| AUCK                | Aukland     | 1                  | 3T Siemens                                          | 3D MPRAGE; FOV = 256 mm2; matrix size = 256x 256 mm; number of slices = 176; slice thickness = 1 mm; voxel-size = 1 x1 x1 mm3; TE/TR/flip angle = 2.07 ms/1900 ms/9deg; GRAPPA acceleration factor = 2; TA = 4.26 min.          | interleaved          | 5.3.0              | Linux                                                |
| BEIJ                | Beijing     | 2                  | 3T Siemens                                          | site 1: MPRAGE; TR 2530ms, TE 2.34ms, FOV 256mm, matrix 256x256, 192 slices, slice thickness 1mm, flip angle 7; site 2: MPRAGE; TR 2530ms, TE 2.34ms, FOV 256mm, matrix 256x256, 172 slices, slice thickness 1mm, flip angle 7; | sagittal             | 6.0.0              | Linux                                                |
| BONNOLIFE           | Bonn O-Life | 1                  | 3T Siemens Trio                                     | TR = 1570 ms; TE = 3.42 ms; inversion time (TI) = 800 ms; flip angle = 15°; FoV = 256 mm; matrix size = 256 x 256; 160 slices; slice thickness = 1 mm; voxel size = 1 x 1 x 1                                                   | sagittal             | 6.0.0              | Virtual linux environmer (singularity on HPC)        |
| BONNRISC            | Bonn RISC   | 2                  | 1.5 T GE Signa Advantage, 3T Siemens Magnetom Verio | GE Signa Advantage: 3D-SPGR voxel resolution: 1 x 1 x 1.5 mm; repetition time (TR): 18 ms; inversion time (TI): 450 ms; echo time (TE): 5.1 ms; bandwidth: 15.63 kHz                                                            | sagittal             | 6.0.0              | Virtual linux environmer (singularity on HPC)        |
| BONNSPQ             | Bonn SPQ    | 1                  | 3T Siemens Magnetom Verio                           | 3D MPRAGE sequence, repetition time of TR = 2400 ms, echo time TE = 3.06 ms, flip angle = 9 degrees with 160 slices, slice thickness = 1.0 mm, voxel size = 1.0 × 1.0 × 1.0 mm, field of view FOV = 256 mm                      | sagittal             | 6.0.0              | Virtual linux environmer (singularity on HPC)        |
| CAM                 | Cambridge   | 1                  | 3T Siemens Trio                                     | MPRAGE; TR/TE 2.98/2300 ms, 1 × 1 voxels, slice thickness 1 mm, flip angle 9°, FOV 24 × 25.6 mm, 176 slices                                                                                                                     | saggital             | 6.0.0              | Unix                                                 |
| DECOP               | London 4    | 1                  | 3T GE                                               | T1-weighted image (196 slices; isotropic voxels of 1.2 mm; TR 7.312 ms; TE 3.016 ms; flip angle: 11°; FOV 270 mm)                                                                                                               | sagittal             | 5.3                | Red Hat Enterprise Linux Serve release 5.1 (Tikanga) |
| FOR2107-MR          | Marburg     | 1                  | 3T Siemens Magnetom TiroTim syngo                   | 3D T1-weighted magnetization prepared rapid acquisition gradient echo (MPRAGE); TR=1900ms, TE=2.26ms, TI=900ms, FA=9°, voxel size=1.0x1.0x1.0mm³, Acquisition Direction Sagittal, 176 slices, slice gap 0.5mm.                  | sagittal             | 5.3                | Red Hat Enterprise Linux Serve release 5.1 (Tikanga) |



| Sample Abbreviation | Sample Name | Number of Scanners | Scanner Type           | Imaging protocols                                                                                                                                                                                                                                                                                                                                                                                                                                                                                                                              | Slice Orientation                  | FreeSurfer Version | Operating System                              |
|---------------------|-------------|--------------------|------------------------|------------------------------------------------------------------------------------------------------------------------------------------------------------------------------------------------------------------------------------------------------------------------------------------------------------------------------------------------------------------------------------------------------------------------------------------------------------------------------------------------------------------------------------------------|------------------------------------|--------------------|-----------------------------------------------|
| FOR2107-MS          | Muenster    | 1                  | 3T Siemens PRISMA      | Site Muenster: 3D T1-weighted magnetization prepared rapid acquisition gradient echo (MPRAGE); TR=2130ms, TE=2.28ms, TI=900ms, FA=8°, voxel size=1.0x1.0x1.0mm <sup>3</sup> , Acquisition Direction Sagittal, 192 slices, no slice gap.                                                                                                                                                                                                                                                                                                        | descending (anterior to posterior) | 6.0.0              | Mac OS SIERRA v 10.12.6                       |
| GENEVA              | Geneva      | 2                  | 3T Siemens Trio        | T1-Weighted images (192 slices, TR=2500ms, TE=3ms, flip angle=( degree, slice hickness=1.1mm, FOV=22cm, Acq matrix 256x256)                                                                                                                                                                                                                                                                                                                                                                                                                    | descending                         | 6.0.1              | Virtual linux environmer (singularity on HPC) |
| GRON1               | Groningen 1 | 1                  | 3T Phillips            | a T1-weighted image was obtained (TR/TE=? 9/3.5?ms) using fast-field echo and turbo-field echo: 170 axial slices; FOV (rl, ap, fh)?=?232? x?170?x?256 mm; flip angle=?8°, voxel size? =?1?x?1?x?1 mm, slice thickness=?1 mm.                                                                                                                                                                                                                                                                                                                   | descending                         | 6.0.1              | Virtual linux environmer (singularity on HPC) |
| GRON2               | Groningen 2 | 1                  | 3T Phillips            | anatomic images were obtained using a sagittal 3-dimensional T1-weighted sequence (176 slices, repetition time 9 ms, echo time 3.5 ms, field of view 256 mm, voxel size 1 × 1 × 1 mm, slice thickness 1.0 mm) using an 8 channel head coil.                                                                                                                                                                                                                                                                                                    | sagittal                           | 5.3                | Mac OS X 10.9.5                               |
| IGP                 | Sydney 2    | 1                  | 3T Phillips Achieva TX | 3D MPRAGE; TR 8.9ms, TE 4.1ms, field of view 240mm, matrix 268 x 268, 200 slices, slice thickness 0.9mm, no gap                                                                                                                                                                                                                                                                                                                                                                                                                                | sagittal                           | 6.0.0              | Linux                                         |
| JENA1               | Jena        | 1                  | 3T Siemens Tim Trio    | 3D T1-weighted MPRAGE, TR: 2300ms, TE: 3.03 ms, flip angle: 9°, 192 slices, field of view 256mm, voxel resolution 1x1x1mm, acquisition time: 5:21min                                                                                                                                                                                                                                                                                                                                                                                           | sequential (top down)              | 6.0.0              | Unix                                          |
| LOND1a              | London 1a   | 1                  | 3T GE Discovery MR750  | 3D T1-weighted inversion recovery prepared gradient echo sequence (voxel size: 1.05 × 1.05 × 1.2 mm, field of view: 270 mm, 196 slices, TR: 7.3 ms, TE: 3.0 ms, inversion time: 400 ms, flip angle = 11°), based on the well-validated ADNI 2/ADNI GO protocols (see <a href="http://adni.loni.usc.edu/methods/documents/mri-protocols/">http://adni.loni.usc.edu/methods/documents/mri-protocols/</a> ( <a href="http://adni.loni.usc.edu/methods/documents/mri-protocols/">http://adni.loni.usc.edu/methods/documents/mri-protocols/</a> )). | interleaved                        | 6.0.0              | Unix                                          |
| LOND1b              | London 1b   | 1                  | 3T Phillips Intera     | T1-weighted 3D fast-field echo (FFE) sequence [repetition time (TR)=25 ms, echo time (TE)=4.6 ms, field of view (FOV)=260 mm, matrix=256x256, 160 contiguous axial slices of 1-mm thickness, voxel size= 1x1x1 mm].                                                                                                                                                                                                                                                                                                                            | axial                              | 6.0.0              | Unix                                          |
| LOND2               | London 2    | 2                  | 1.5 T GE, 3T GE        | 1.5 T GE: 3D, TR=11.1 ms, TE=4.9 ms, inversion time=300 ms, acquisition matrix=256 x 160, 150 locations, slice thickness=1.1 mm, in-plane resolution=1.094 mm, flip angle=18°; 3 T GE: TR: 7.3 ms, TE: 3.0 ms, inversion time: 400 ms, voxel size: 1.05 x1.05 x1.2mm, field of view: 270mm, 196 slices, flip angle = 11°                                                                                                                                                                                                                       | interleaved                        | 6.0.0              | Mac                                           |

| Sample Abbreviation | Sample Name                  | Number of Scanners | Scanner Type                                        | Imaging protocols                                                                                                                                                                                                                                                                                                                                                     | Slice Orientation     | FreeSurfer Version | Operating System                                      |
|---------------------|------------------------------|--------------------|-----------------------------------------------------|-----------------------------------------------------------------------------------------------------------------------------------------------------------------------------------------------------------------------------------------------------------------------------------------------------------------------------------------------------------------------|-----------------------|--------------------|-------------------------------------------------------|
| LOND5               | London 5                     | 1                  | 3T Siemens                                          | MPRAGE; TR 1900ms; 1mm x 1mm 1mm voxel size; in plane resolution of 256 x 256 x 176 slices, flip angle 11, slice thickness 1mm, TE = 2.07ms                                                                                                                                                                                                                           | sequential (top down) | 6.0.0              | Unix                                                  |
| LONDRoe             | London 3                     | 1                  | 3T Siemens                                          | MPRAGE; TR 2000ms; 1mm x 1mm 1mm. 256 x 256 x 176 slices, flip angle 11, slice thickness 1mm, TE = 2.07ms                                                                                                                                                                                                                                                             | interleaved           | 6.0.0              | Linux Ubuntu Bionic                                   |
| MELB                | Melbourne                    | 1                  | 3T Siemens                                          | 3D magnetic-prepared rapid gradient echo sequence. A total of 192 slices were acquired for each participant's T1-weighted images using an ascending acquisition with the following parameters: TR of 2300 ms, TE of 2.07 ms, flip angle of 9°, FOV of 256mm, and voxel size of 1mm <sup>3</sup> .                                                                     | sagittal              | 5.3.0              | Linux                                                 |
| MNC                 | Muenster Neuroimaging Cohort | 1                  | 3T scanner Gyroscan Intera, Philips Medical Systems | 3D fast gradient echo sequence (turbo field echo), TR = 7.4 ms, TE = 3.4 ms, Flip Angle = 9°, two signal averages, inversion prepulse every 814.5 ms, acquired over a FOV of 256 (feet-head [FH]) × 204 (anterior-posterior [AP]) × 160 (right-left [RL]) mm, phase encoding in AP and RL direction, reconstructed to cubic voxels of .5 × .5 × .5 mm                 | sagittal              | 5.3                | Red Hat Enterprise Linux Server release 5.1 (Tikanga) |
| MOSC                | Moscow                       | 1                  | 3 T Phillips Ingenia                                | 3D T1-weighted TFE; TR=7.9 ms, TE=3.5 ms; flip angle 8; number of slices=170; voxel size=0.98 x 0.98 x 1.0, no gap                                                                                                                                                                                                                                                    | axial                 | 5.3                | LinuxCentC 6.10                                       |
| MTL                 | Montreal                     | 1                  | 3T Siemens Trio                                     | 3D T1-weighted images were acquired with a gradient echo T1-weighted sequence, voxel size 1x1x1 mm <sup>3</sup> . TR=1900ms; TE=4.9ms; FA=25; matrix 176x256x256                                                                                                                                                                                                      | sagittal              | 6.0.0              | Unix                                                  |
| NYC                 | New York                     | 1                  | 3T GE                                               | 3D-SPGR images using a 1mm thick slice acquisition with image parameters: TR = 7.5 ms, TE = 3 ms, matrix = 256x256, FOV = 240 mm, 216 contiguous images.                                                                                                                                                                                                              | interleaved           | 6.0.0              | Linux                                                 |
| UTR                 | Utrecht                      | 1                  | 3T Phillips Achieva                                 | T1-weighted images were acquired with a 3D T1 turbo field-echo sequence. The acquisition protocol parameters were: 160 slices; repetition time = 9.96 ms; echo time = 4.59 ms; flip angle 8°; 1 mm slice thickness with no inter-slice gap; matrix = 256 × 256 and field of view 224 mm, achieving a voxel size of 0.875 × 0.875 × 1 mm. Scan time was 8 min and 50 s | sagittal              | 5.1.0              | Unix                                                  |
| ZUR1                | Zurich 1                     | 1                  | 3T Phillips                                         | 3D T1-weighted images were acquired with an ultrafast gradient echo T1-weighted sequence (TR=8.4ms, TE=3.8ms, flip angle=8°) in 160 sagittal plan slices (1mm slice thickness, no slice gap) of 240×240mm <sup>2</sup> resulting in 1x1x1mm <sup>3</sup> voxels.                                                                                                      | sagittal              | 6.0.0              | Unix                                                  |
| ZUR2                | Zurich 2                     | 1                  | 3T Phillips Achieva                                 | 3D T1-weighted images; 160 slices; TR, 8.2 ms; TE, 3.8 ms; flip angle, 8°; spatial resolution, 1 × 1 × 1 mm <sup>3</sup> ; FOV = 160 × 240 mm <sup>2</sup>                                                                                                                                                                                                            | sagittal              | 6.0.0              | OS X                                                  |

## Meta-analyses

Note - Measures of heterogeneity

Tau<sup>2</sup>: Represents the absolute value of the true variance of the effect sizes, between-study variance

The I<sup>2</sup> statistic: Represents the proportion (in percentage) of total variation in the estimates that can be attributed to heterogeneity among the effects rather than sampling variability. The I<sup>2</sup> may be interpreted according to the following ranges I<sup>2</sup> = 0-40%: low heterogeneity, I<sup>2</sup> = 30-60%: moderate heterogeneity, I<sup>2</sup> = 50-90%: substantial heterogeneity, I<sup>2</sup> = 75-100%: considerable heterogeneity

The H<sup>2</sup> statistic: Represents the ratio of the total amount of variability in the effect size estimates to the amount of sampling variability

Table S7: Cortical Thickness Continuous Model - No Thickness Covariate

| Region                      | N    | Effect Size (r) | SE    | Lower CI | Upper CI | tau <sup>2</sup> | I <sup>2</sup> | H <sup>2</sup> | pvalue | FDRp  |
|-----------------------------|------|-----------------|-------|----------|----------|------------------|----------------|----------------|--------|-------|
| L_bankssts                  | 2746 | 0.016           | 0.029 | -0.040   | 0.073    | 0.010            | 48.214         | 1.931          | 0.567  | 0.969 |
| L_caudalanteriorcingulate   | 2884 | 0.017           | 0.019 | -0.019   | 0.054    | 0.000            | 0.000          | 1.000          | 0.356  | 0.969 |
| L_caudalmiddlefrontal       | 2886 | -0.004          | 0.031 | -0.064   | 0.057    | 0.013            | 57.288         | 2.341          | 0.907  | 0.969 |
| L_cuneus                    | 2777 | -0.004          | 0.026 | -0.055   | 0.047    | 0.006            | 36.154         | 1.566          | 0.878  | 0.969 |
| L_entorhinal                | 2755 | -0.022          | 0.019 | -0.059   | 0.016    | 0.000            | 0.000          | 1.000          | 0.257  | 0.969 |
| L_fusiform                  | 2870 | -0.028          | 0.023 | -0.073   | 0.018    | 0.004            | 26.235         | 1.356          | 0.237  | 0.969 |
| L_inferiorparietal          | 2828 | -0.012          | 0.019 | -0.049   | 0.025    | 0.000            | 0.000          | 1.000          | 0.524  | 0.969 |
| L_inferiortemporal          | 2843 | -0.010          | 0.019 | -0.047   | 0.026    | 0.000            | 0.000          | 1.000          | 0.577  | 0.969 |
| L_isthmuscingulate          | 2898 | -0.022          | 0.027 | -0.075   | 0.032    | 0.008            | 45.032         | 1.819          | 0.422  | 0.969 |
| L_lateraloccipital          | 2866 | 0.030           | 0.025 | -0.019   | 0.079    | 0.005            | 35.385         | 1.548          | 0.236  | 0.969 |
| L_lateralorbitofrontal      | 2873 | 0.004           | 0.027 | -0.048   | 0.056    | 0.007            | 41.370         | 1.706          | 0.878  | 0.969 |
| L_lingual                   | 2842 | -0.018          | 0.019 | -0.055   | 0.020    | 0.000            | 2.970          | 1.031          | 0.357  | 0.969 |
| L_medialorbitofrontal       | 2862 | 0.051           | 0.022 | 0.008    | 0.095    | 0.002            | 19.860         | 1.248          | 0.021  | 0.246 |
| L_middletemporal            | 2756 | -0.013          | 0.019 | -0.050   | 0.024    | 0.000            | 0.000          | 1.000          | 0.493  | 0.969 |
| L parahippocampal           | 2888 | 0.012           | 0.028 | -0.043   | 0.067    | 0.009            | 48.631         | 1.947          | 0.669  | 0.969 |
| L_paracentral               | 2897 | -0.040          | 0.021 | -0.082   | 0.001    | 0.002            | 15.386         | 1.182          | 0.057  | 0.514 |
| L_parsopercularis           | 2875 | -0.005          | 0.024 | -0.052   | 0.042    | 0.004            | 30.249         | 1.434          | 0.838  | 0.969 |
| L_parsorbitalis             | 2885 | 0.003           | 0.019 | -0.033   | 0.040    | 0.000            | 0.000          | 1.000          | 0.868  | 0.969 |
| L_parstriangularis          | 2873 | -0.014          | 0.034 | -0.080   | 0.052    | 0.018            | 64.460         | 2.814          | 0.685  | 0.969 |
| L_pericalcarine             | 2811 | -0.020          | 0.025 | -0.068   | 0.029    | 0.005            | 30.743         | 1.444          | 0.426  | 0.969 |
| L_postcentral               | 2838 | -0.017          | 0.027 | -0.070   | 0.036    | 0.008            | 43.400         | 1.767          | 0.521  | 0.969 |
| L_posteriorcingulate        | 2896 | 0.023           | 0.019 | -0.013   | 0.060    | 0.000            | 0.000          | 1.000          | 0.208  | 0.969 |
| L_precentral                | 2855 | -0.022          | 0.022 | -0.064   | 0.020    | 0.002            | 16.485         | 1.197          | 0.307  | 0.969 |
| L_precuneus                 | 2887 | -0.003          | 0.023 | -0.047   | 0.042    | 0.003            | 22.911         | 1.297          | 0.899  | 0.969 |
| L_rostral anteriorcingulate | 2875 | 0.036           | 0.019 | -0.001   | 0.072    | 0.000            | 0.000          | 1.000          | 0.056  | 0.514 |
| L_rostralmiddlefrontal      | 2886 | -0.012          | 0.024 | -0.059   | 0.035    | 0.004            | 29.607         | 1.421          | 0.620  | 0.969 |
| L_superiorfrontal           | 2879 | -0.010          | 0.019 | -0.046   | 0.027    | 0.000            | 0.000          | 1.000          | 0.597  | 0.969 |

| Region                     | N    | Effect Size (r) | SE    | Lower CI | Upper CI | tau <sup>2</sup> | I <sup>2</sup> | H <sup>2</sup> | pvalue | FDRp  |
|----------------------------|------|-----------------|-------|----------|----------|------------------|----------------|----------------|--------|-------|
| L_superiorparietal         | 2851 | -0.023          | 0.020 | -0.063   | 0.016    | 0.001            | 8.610          | 1.094          | 0.252  | 0.969 |
| L_superiortemporal         | 2733 | -0.002          | 0.028 | -0.056   | 0.052    | 0.008            | 43.695         | 1.776          | 0.945  | 0.991 |
| L_supramarginal            | 2775 | -0.027          | 0.019 | -0.064   | 0.010    | 0.000            | 0.000          | 1.000          | 0.149  | 0.969 |
| L_frontalpole              | 2902 | 0.044           | 0.018 | 0.008    | 0.080    | 0.000            | 0.000          | 1.000          | 0.017  | 0.233 |
| L_temporalpole             | 2864 | 0.020           | 0.019 | -0.017   | 0.056    | 0.000            | 0.000          | 1.000          | 0.290  | 0.969 |
| L_transversetemporal       | 2903 | 0.035           | 0.021 | -0.007   | 0.077    | 0.002            | 16.767         | 1.201          | 0.101  | 0.779 |
| L_insula                   | 2829 | 0.000           | 0.025 | -0.048   | 0.049    | 0.005            | 32.748         | 1.487          | 0.997  | 0.997 |
| R_bankssts                 | 2840 | 0.026           | 0.027 | -0.026   | 0.079    | 0.008            | 43.210         | 1.761          | 0.327  | 0.969 |
| R_caudalanteriorcingulate  | 2897 | 0.024           | 0.029 | -0.033   | 0.081    | 0.011            | 51.777         | 2.074          | 0.412  | 0.969 |
| R_caudalmiddlefrontal      | 2884 | -0.002          | 0.022 | -0.046   | 0.042    | 0.003            | 21.706         | 1.277          | 0.927  | 0.981 |
| R_cuneus                   | 2793 | -0.012          | 0.024 | -0.059   | 0.035    | 0.004            | 28.547         | 1.400          | 0.618  | 0.969 |
| R_entorhinal               | 2695 | 0.003           | 0.021 | -0.038   | 0.044    | 0.001            | 9.055          | 1.100          | 0.893  | 0.969 |
| R_fusiform                 | 2877 | 0.000           | 0.024 | -0.046   | 0.046    | 0.004            | 27.405         | 1.378          | 0.991  | 0.997 |
| R_inferiorparietal         | 2828 | 0.008           | 0.028 | -0.047   | 0.062    | 0.008            | 45.382         | 1.831          | 0.784  | 0.969 |
| R_inferiortemporal         | 2855 | -0.020          | 0.029 | -0.077   | 0.037    | 0.010            | 51.045         | 2.043          | 0.495  | 0.969 |
| R_isthmuscingulate         | 2890 | -0.047          | 0.019 | -0.084   | -0.011   | 0.000            | 0.000          | 1.000          | 0.011  | 0.164 |
| R_lateraloccipital         | 2868 | 0.006           | 0.028 | -0.048   | 0.060    | 0.008            | 45.453         | 1.833          | 0.830  | 0.969 |
| R_lateralorbitofrontal     | 2853 | 0.007           | 0.032 | -0.056   | 0.069    | 0.014            | 58.990         | 2.438          | 0.835  | 0.969 |
| R_lingual                  | 2843 | -0.023          | 0.027 | -0.075   | 0.029    | 0.007            | 41.524         | 1.710          | 0.386  | 0.969 |
| R_medialorbitofrontal      | 2847 | 0.061           | 0.019 | 0.025    | 0.097    | 0.000            | 0.000          | 1.000          | 0.001  | 0.037 |
| R_middletemporal           | 2832 | 0.023           | 0.029 | -0.033   | 0.078    | 0.010            | 48.635         | 1.947          | 0.430  | 0.969 |
| R parahippocampal          | 2897 | -0.005          | 0.024 | -0.052   | 0.043    | 0.005            | 32.269         | 1.476          | 0.848  | 0.969 |
| R_paracentral              | 2894 | -0.019          | 0.029 | -0.076   | 0.038    | 0.010            | 51.473         | 2.061          | 0.515  | 0.969 |
| R_parsopercularis          | 2859 | 0.004           | 0.019 | -0.032   | 0.041    | 0.000            | 0.000          | 1.000          | 0.813  | 0.969 |
| R_parsorbitalis            | 2882 | -0.010          | 0.030 | -0.068   | 0.049    | 0.012            | 53.737         | 2.162          | 0.745  | 0.969 |
| R_parstriangularis         | 2853 | 0.001           | 0.019 | -0.036   | 0.038    | 0.000            | 0.000          | 1.000          | 0.958  | 0.995 |
| R_pericalcarine            | 2795 | 0.019           | 0.032 | -0.044   | 0.082    | 0.015            | 59.607         | 2.476          | 0.558  | 0.969 |
| R_postcentral              | 2852 | -0.024          | 0.024 | -0.071   | 0.024    | 0.004            | 29.856         | 1.426          | 0.326  | 0.969 |
| R_posteriorcingulate       | 2900 | 0.013           | 0.018 | -0.024   | 0.049    | 0.000            | 0.000          | 1.000          | 0.493  | 0.969 |
| R_precentral               | 2859 | -0.041          | 0.028 | -0.096   | 0.015    | 0.010            | 49.213         | 1.969          | 0.153  | 0.969 |
| R_precuneus                | 2886 | -0.014          | 0.031 | -0.074   | 0.046    | 0.013            | 56.638         | 2.306          | 0.653  | 0.969 |
| R_rostralanteriorcingulate | 2853 | 0.030           | 0.024 | -0.017   | 0.076    | 0.004            | 27.177         | 1.373          | 0.209  | 0.969 |
| R_rostralmiddlefrontal     | 2867 | -0.002          | 0.019 | -0.039   | 0.034    | 0.000            | 0.000          | 1.000          | 0.903  | 0.969 |
| R_superiorfrontal          | 2881 | -0.001          | 0.024 | -0.047   | 0.045    | 0.004            | 27.735         | 1.384          | 0.974  | 0.997 |

| Region               | N    | Effect Size (r) | SE    | Lower CI | Upper CI | tau <sup>2</sup> | I <sup>2</sup> | H <sup>2</sup> | pvalue | FDRp  |
|----------------------|------|-----------------|-------|----------|----------|------------------|----------------|----------------|--------|-------|
| R_superiorparietal   | 2866 | -0.016          | 0.028 | -0.071   | 0.039    | 0.009            | 48.389         | 1.938          | 0.571  | 0.969 |
| R_superiortemporal   | 2802 | 0.011           | 0.023 | -0.034   | 0.056    | 0.003            | 22.902         | 1.297          | 0.644  | 0.969 |
| R_supramarginal      | 2794 | 0.000           | 0.019 | -0.037   | 0.037    | 0.000            | 0.000          | 1.000          | 0.990  | 0.997 |
| R_frontalpole        | 2894 | 0.049           | 0.018 | 0.012    | 0.085    | 0.000            | 0.000          | 1.000          | 0.008  | 0.152 |
| R_temporalpole       | 2820 | 0.017           | 0.024 | -0.029   | 0.063    | 0.004            | 25.975         | 1.351          | 0.466  | 0.969 |
| R_transversetemporal | 2905 | 0.011           | 0.023 | -0.035   | 0.057    | 0.004            | 27.639         | 1.382          | 0.637  | 0.969 |
| R_insula             | 2797 | -0.014          | 0.026 | -0.064   | 0.036    | 0.006            | 35.994         | 1.562          | 0.582  | 0.969 |
| LThickness           | 2907 | -0.014          | 0.024 | -0.061   | 0.033    | 0.004            | 30.355         | 1.436          | 0.550  | 0.969 |
| RThickness           | 2907 | -0.010          | 0.027 | -0.063   | 0.042    | 0.008            | 43.677         | 1.775          | 0.699  | 0.969 |

Table S8: Cortical Surface Area Continuous Model - No Surface Area Covariate

| Region                    | N    | Effect Size (r) | SE    | Lower CI | Upper CI | tau <sup>2</sup> | I <sup>2</sup> | H <sup>2</sup> | pvalue | FDRp  |
|---------------------------|------|-----------------|-------|----------|----------|------------------|----------------|----------------|--------|-------|
| L_bankssts                | 2682 | 0.009           | 0.019 | -0.028   | 0.047    | 0.000            | 0.000          | 1.000          | 0.627  | 0.916 |
| L_caudalanteriorcingulate | 2812 | -0.005          | 0.022 | -0.048   | 0.039    | 0.002            | 19.198         | 1.238          | 0.834  | 0.936 |
| L_caudalmiddlefrontal     | 2815 | -0.009          | 0.021 | -0.050   | 0.033    | 0.002            | 12.851         | 1.147          | 0.685  | 0.924 |
| L_cuneus                  | 2717 | -0.018          | 0.020 | -0.058   | 0.021    | 0.001            | 6.306          | 1.067          | 0.364  | 0.916 |
| L_entorhinal              | 2683 | -0.024          | 0.019 | -0.063   | 0.014    | 0.000            | 1.631          | 1.017          | 0.209  | 0.916 |
| L_fusiform                | 2798 | -0.036          | 0.019 | -0.072   | 0.001    | 0.000            | 0.000          | 1.000          | 0.059  | 0.916 |
| L_inferiorparietal        | 2757 | -0.007          | 0.019 | -0.044   | 0.030    | 0.000            | 0.000          | 1.000          | 0.712  | 0.931 |
| L_inferiortemporal        | 2771 | -0.010          | 0.019 | -0.047   | 0.027    | 0.000            | 0.000          | 1.000          | 0.590  | 0.916 |
| L_isthmuscingulate        | 2826 | 0.008           | 0.019 | -0.028   | 0.045    | 0.000            | 0.000          | 1.000          | 0.659  | 0.924 |
| L_lateraloccipital        | 2794 | -0.033          | 0.019 | -0.070   | 0.003    | 0.000            | 0.000          | 1.000          | 0.075  | 0.916 |
| L_lateralorbitofrontal    | 2801 | -0.005          | 0.019 | -0.042   | 0.032    | 0.000            | 0.000          | 1.000          | 0.783  | 0.936 |
| L_lingual                 | 2778 | 0.002           | 0.025 | -0.048   | 0.052    | 0.005            | 34.053         | 1.516          | 0.932  | 0.949 |
| L_medialorbitofrontal     | 2790 | -0.027          | 0.032 | -0.089   | 0.035    | 0.014            | 58.706         | 2.422          | 0.398  | 0.916 |
| L_middletemporal          | 2691 | 0.013           | 0.019 | -0.025   | 0.050    | 0.000            | 0.000          | 1.000          | 0.514  | 0.916 |
| L parahippocampal         | 2815 | -0.051          | 0.019 | -0.087   | -0.014   | 0.000            | 0.000          | 1.000          | 0.007  | 0.253 |
| L_paracentral             | 2825 | 0.021           | 0.028 | -0.035   | 0.076    | 0.009            | 48.043         | 1.925          | 0.465  | 0.916 |
| L_parsopercularis         | 2803 | 0.010           | 0.019 | -0.026   | 0.047    | 0.000            | 0.000          | 1.000          | 0.580  | 0.916 |
| L_parsorbitalis           | 2813 | 0.012           | 0.019 | -0.025   | 0.049    | 0.000            | 0.000          | 1.000          | 0.521  | 0.916 |
| L_parstriangularis        | 2801 | -0.018          | 0.019 | -0.055   | 0.019    | 0.000            | 0.000          | 1.000          | 0.344  | 0.916 |
| L_pericalcarine           | 2751 | -0.018          | 0.024 | -0.065   | 0.028    | 0.003            | 24.680         | 1.328          | 0.439  | 0.916 |
| L_postcentral             | 2771 | 0.015           | 0.019 | -0.022   | 0.052    | 0.000            | 0.000          | 1.000          | 0.431  | 0.916 |

| Region                     | N    | Effect Size (r) | SE    | Lower CI | Upper CI | tau <sup>2</sup> | I <sup>2</sup> | H <sup>2</sup> | pvalue | FDRp  |
|----------------------------|------|-----------------|-------|----------|----------|------------------|----------------|----------------|--------|-------|
| L_posteriorcingulate       | 2822 | 0.013           | 0.019 | -0.024   | 0.049    | 0.000            | 0.000          | 1.000          | 0.504  | 0.916 |
| L_precentral               | 2787 | -0.017          | 0.019 | -0.054   | 0.019    | 0.000            | 0.000          | 1.000          | 0.355  | 0.916 |
| L_precuneus                | 2815 | 0.008           | 0.034 | -0.059   | 0.074    | 0.018            | 64.406         | 2.809          | 0.823  | 0.936 |
| L_rostralanteriorcingulate | 2803 | -0.020          | 0.020 | -0.060   | 0.020    | 0.001            | 8.361          | 1.091          | 0.334  | 0.916 |
| L_rostralmiddlefrontal     | 2814 | 0.009           | 0.019 | -0.028   | 0.045    | 0.000            | 0.000          | 1.000          | 0.648  | 0.924 |
| L_superiorfrontal          | 2807 | 0.003           | 0.029 | -0.053   | 0.059    | 0.009            | 47.954         | 1.921          | 0.920  | 0.949 |
| L_superiorparietal         | 2779 | 0.023           | 0.027 | -0.030   | 0.076    | 0.007            | 41.086         | 1.697          | 0.398  | 0.916 |
| L_superiortemporal         | 2665 | 0.008           | 0.023 | -0.037   | 0.053    | 0.003            | 19.092         | 1.236          | 0.736  | 0.935 |
| L_supramarginal            | 2705 | 0.033           | 0.026 | -0.017   | 0.083    | 0.005            | 33.790         | 1.510          | 0.194  | 0.916 |
| L_frontalpole              | 2830 | -0.006          | 0.024 | -0.054   | 0.042    | 0.005            | 31.018         | 1.450          | 0.800  | 0.936 |
| L_temporalpole             | 2791 | -0.024          | 0.023 | -0.070   | 0.021    | 0.003            | 24.406         | 1.323          | 0.298  | 0.916 |
| L_transversetemporal       | 2831 | -0.016          | 0.019 | -0.053   | 0.021    | 0.000            | 0.000          | 1.000          | 0.391  | 0.916 |
| L_insula                   | 2757 | -0.021          | 0.024 | -0.068   | 0.025    | 0.004            | 26.053         | 1.352          | 0.368  | 0.916 |
| R_bankssts                 | 2768 | 0.019           | 0.027 | -0.035   | 0.073    | 0.008            | 43.014         | 1.755          | 0.486  | 0.916 |
| R_caudalanteriorcingulate  | 2824 | -0.017          | 0.019 | -0.054   | 0.019    | 0.000            | 0.089          | 1.001          | 0.353  | 0.916 |
| R_caudalmiddlefrontal      | 2812 | -0.027          | 0.019 | -0.063   | 0.010    | 0.000            | 0.000          | 1.000          | 0.156  | 0.916 |
| R_cuneus                   | 2731 | -0.019          | 0.023 | -0.065   | 0.027    | 0.003            | 23.123         | 1.301          | 0.413  | 0.916 |
| R_entorhinal               | 2621 | -0.042          | 0.029 | -0.099   | 0.016    | 0.010            | 47.935         | 1.921          | 0.157  | 0.916 |
| R_fusiform                 | 2805 | -0.005          | 0.019 | -0.042   | 0.032    | 0.000            | 0.000          | 1.000          | 0.783  | 0.936 |
| R_inferiorparietal         | 2758 | 0.000           | 0.019 | -0.038   | 0.037    | 0.000            | 0.000          | 1.000          | 0.981  | 0.981 |
| R_inferiortemporal         | 2783 | -0.008          | 0.023 | -0.052   | 0.036    | 0.003            | 20.114         | 1.252          | 0.726  | 0.934 |
| R_isthmuscingulate         | 2817 | 0.030           | 0.029 | -0.026   | 0.087    | 0.010            | 50.300         | 2.012          | 0.294  | 0.916 |
| R_lateraloccipital         | 2796 | -0.019          | 0.019 | -0.056   | 0.018    | 0.000            | 0.000          | 1.000          | 0.322  | 0.916 |
| R_lateralorbitofrontal     | 2781 | -0.010          | 0.019 | -0.047   | 0.027    | 0.000            | 0.000          | 1.000          | 0.587  | 0.916 |
| R_lingual                  | 2781 | -0.016          | 0.019 | -0.053   | 0.021    | 0.000            | 0.000          | 1.000          | 0.401  | 0.916 |
| R_medialorbitofrontal      | 2775 | -0.039          | 0.019 | -0.076   | -0.002   | 0.000            | 0.000          | 1.000          | 0.038  | 0.916 |
| R_middletemporal           | 2762 | -0.015          | 0.019 | -0.053   | 0.022    | 0.000            | 0.000          | 1.000          | 0.415  | 0.916 |
| R parahippocampal          | 2825 | -0.005          | 0.021 | -0.046   | 0.036    | 0.001            | 10.837         | 1.122          | 0.806  | 0.936 |
| R_paracentral              | 2822 | -0.006          | 0.027 | -0.059   | 0.047    | 0.008            | 42.734         | 1.746          | 0.830  | 0.936 |
| R_parsopercularis          | 2787 | 0.012           | 0.019 | -0.025   | 0.049    | 0.000            | 0.000          | 1.000          | 0.531  | 0.916 |
| R_parsorbitalis            | 2810 | -0.022          | 0.024 | -0.068   | 0.024    | 0.004            | 25.931         | 1.350          | 0.348  | 0.916 |
| R_parstriangularis         | 2781 | -0.004          | 0.019 | -0.041   | 0.033    | 0.000            | 0.000          | 1.000          | 0.842  | 0.936 |
| R_pericalcarine            | 2735 | -0.034          | 0.019 | -0.072   | 0.003    | 0.000            | 0.000          | 1.000          | 0.072  | 0.916 |
| R_postcentral              | 2785 | 0.028           | 0.022 | -0.016   | 0.073    | 0.003            | 19.763         | 1.246          | 0.205  | 0.916 |

| Region                     | N    | Effect Size (r) | SE    | Lower CI | Upper CI | tau <sup>2</sup> | I <sup>2</sup> | H <sup>2</sup> | pvalue | FDRp  |
|----------------------------|------|-----------------|-------|----------|----------|------------------|----------------|----------------|--------|-------|
| R_posteriorcingulate       | 2826 | -0.005          | 0.019 | -0.043   | 0.032    | 0.000            | 2.394          | 1.025          | 0.776  | 0.936 |
| R_precentral               | 2791 | -0.008          | 0.019 | -0.045   | 0.029    | 0.000            | 0.000          | 1.000          | 0.684  | 0.924 |
| R_precuneus                | 2814 | 0.034           | 0.031 | -0.026   | 0.094    | 0.012            | 55.228         | 2.234          | 0.270  | 0.916 |
| R_rostralanteriorcingulate | 2781 | -0.011          | 0.020 | -0.051   | 0.029    | 0.001            | 8.245          | 1.090          | 0.592  | 0.916 |
| R_rostralmiddlefrontal     | 2795 | 0.001           | 0.019 | -0.036   | 0.038    | 0.000            | 0.000          | 1.000          | 0.967  | 0.976 |
| R_superiorfrontal          | 2809 | -0.006          | 0.024 | -0.052   | 0.040    | 0.004            | 25.644         | 1.345          | 0.805  | 0.936 |
| R_superiorparietal         | 2794 | 0.021           | 0.027 | -0.031   | 0.074    | 0.007            | 40.321         | 1.676          | 0.425  | 0.916 |
| R_superiortemporal         | 2730 | 0.003           | 0.019 | -0.035   | 0.040    | 0.000            | 0.000          | 1.000          | 0.888  | 0.947 |
| R_supramarginal            | 2723 | -0.005          | 0.025 | -0.054   | 0.044    | 0.005            | 31.945         | 1.469          | 0.850  | 0.936 |
| R_frontalpole              | 2821 | 0.012           | 0.019 | -0.025   | 0.048    | 0.000            | 0.000          | 1.000          | 0.534  | 0.916 |
| R_temporalpole             | 2748 | -0.009          | 0.019 | -0.047   | 0.028    | 0.000            | 0.000          | 1.000          | 0.625  | 0.916 |
| R_transversetemporal       | 2833 | -0.013          | 0.022 | -0.057   | 0.030    | 0.002            | 19.490         | 1.242          | 0.550  | 0.916 |
| R_insula                   | 2725 | -0.010          | 0.019 | -0.047   | 0.028    | 0.000            | 0.000          | 1.000          | 0.607  | 0.916 |
| LSurfArea                  | 2835 | -0.012          | 0.019 | -0.048   | 0.025    | 0.000            | 0.000          | 1.000          | 0.536  | 0.916 |
| RSurfArea                  | 2835 | -0.010          | 0.019 | -0.047   | 0.027    | 0.000            | 0.000          | 1.000          | 0.597  | 0.916 |

Table S9: Effect of Schizotypy in Subgroup with Smoking Data

| Region                    | N    | Effect Size (r) | SE    | Lower CI | Upper CI | tau <sup>2</sup> | I <sup>2</sup> | H <sup>2</sup> | pvalue | FDRp  |
|---------------------------|------|-----------------|-------|----------|----------|------------------|----------------|----------------|--------|-------|
| L_bankssts                | 1212 | -0.034          | 0.029 | -0.090   | 0.022    | 0.000            | 0.000          | 1.000          | 0.239  | 0.958 |
| L_caudalanteriorcingulate | 1300 | 0.006           | 0.046 | -0.084   | 0.096    | 0.009            | 56.059         | 2.276          | 0.902  | 0.960 |
| L_caudalmiddlefrontal     | 1307 | -0.013          | 0.075 | -0.160   | 0.135    | 0.036            | 84.669         | 6.523          | 0.864  | 0.960 |
| L_cuneus                  | 1276 | -0.010          | 0.049 | -0.107   | 0.087    | 0.011            | 61.171         | 2.575          | 0.840  | 0.960 |
| L_entorhinal              | 1233 | -0.017          | 0.033 | -0.082   | 0.049    | 0.002            | 19.491         | 1.242          | 0.614  | 0.958 |
| L_fusiform                | 1311 | -0.068          | 0.049 | -0.163   | 0.028    | 0.011            | 61.796         | 2.618          | 0.166  | 0.958 |
| L_inferiorparietal        | 1308 | -0.034          | 0.043 | -0.118   | 0.051    | 0.007            | 50.303         | 2.012          | 0.433  | 0.958 |
| L_inferiortemporal        | 1293 | -0.045          | 0.028 | -0.099   | 0.010    | 0.000            | 0.000          | 1.000          | 0.109  | 0.958 |
| L_isthmuscingulate        | 1312 | 0.004           | 0.041 | -0.075   | 0.084    | 0.005            | 44.816         | 1.812          | 0.915  | 0.964 |
| L_lateraloccipital        | 1313 | -0.011          | 0.046 | -0.102   | 0.080    | 0.009            | 57.545         | 2.355          | 0.819  | 0.960 |
| L_lateralorbitofrontal    | 1315 | -0.014          | 0.039 | -0.089   | 0.062    | 0.004            | 39.168         | 1.644          | 0.724  | 0.958 |
| L_lingual                 | 1306 | -0.011          | 0.032 | -0.073   | 0.051    | 0.001            | 16.309         | 1.195          | 0.728  | 0.958 |
| L_medialorbitofrontal     | 1303 | 0.037           | 0.029 | -0.020   | 0.093    | 0.000            | 5.830          | 1.062          | 0.203  | 0.958 |
| L_middletemporal          | 1250 | -0.012          | 0.028 | -0.067   | 0.043    | 0.000            | 0.000          | 1.000          | 0.668  | 0.958 |
| L parahippocampal         | 1313 | -0.020          | 0.041 | -0.101   | 0.060    | 0.006            | 45.539         | 1.836          | 0.616  | 0.958 |

<sup>a</sup> Sites with smoking data include BONNRISC, BONNSPQ, FOR2107-MR, FOR2017-MS, MNC, NYC, ZUR1, ZUR2

| Region                     | N    | Effect Size (r) | SE    | Lower CI | Upper CI | tau <sup>2</sup> | I <sup>2</sup> | H <sup>2</sup> | pvalue | FDRp  |
|----------------------------|------|-----------------|-------|----------|----------|------------------|----------------|----------------|--------|-------|
| L_paracentral              | 1312 | -0.049          | 0.063 | -0.171   | 0.074    | 0.022            | 77.198         | 4.386          | 0.435  | 0.958 |
| L_parsopercularis          | 1304 | -0.053          | 0.049 | -0.149   | 0.043    | 0.011            | 61.722         | 2.612          | 0.280  | 0.958 |
| L_parsorbitalis            | 1309 | -0.013          | 0.028 | -0.067   | 0.042    | 0.000            | 0.000          | 1.000          | 0.649  | 0.958 |
| L_parstriangularis         | 1307 | -0.048          | 0.076 | -0.196   | 0.101    | 0.037            | 84.997         | 6.665          | 0.531  | 0.958 |
| L_pericalcarine            | 1291 | 0.006           | 0.041 | -0.073   | 0.086    | 0.005            | 44.174         | 1.791          | 0.874  | 0.960 |
| L_postcentral              | 1294 | -0.064          | 0.071 | -0.203   | 0.075    | 0.031            | 82.562         | 5.735          | 0.367  | 0.958 |
| L_posteriorcingulate       | 1311 | 0.000           | 0.028 | -0.054   | 0.054    | 0.000            | 0.000          | 1.000          | 0.997  | 0.997 |
| L_precentral               | 1298 | -0.028          | 0.044 | -0.115   | 0.058    | 0.007            | 52.802         | 2.119          | 0.521  | 0.958 |
| L_precuneus                | 1315 | -0.035          | 0.029 | -0.093   | 0.022    | 0.001            | 7.797          | 1.085          | 0.230  | 0.958 |
| L_rostralanteriorcingulate | 1298 | 0.023           | 0.028 | -0.031   | 0.077    | 0.000            | 0.000          | 1.000          | 0.403  | 0.958 |
| L_rostralmiddlefrontal     | 1309 | 0.001           | 0.028 | -0.053   | 0.055    | 0.000            | 0.000          | 1.000          | 0.975  | 0.985 |
| L_superiorfrontal          | 1300 | -0.031          | 0.046 | -0.121   | 0.059    | 0.009            | 56.317         | 2.289          | 0.504  | 0.958 |
| L_superiorparietal         | 1306 | -0.066          | 0.053 | -0.170   | 0.038    | 0.014            | 67.730         | 3.099          | 0.211  | 0.958 |
| L_superiortemporal         | 1214 | -0.054          | 0.043 | -0.138   | 0.030    | 0.006            | 47.254         | 1.896          | 0.209  | 0.958 |
| L_supramarginal            | 1268 | -0.041          | 0.042 | -0.124   | 0.042    | 0.006            | 47.590         | 1.908          | 0.330  | 0.958 |
| L_frontalpole              | 1315 | 0.037           | 0.057 | -0.074   | 0.148    | 0.017            | 71.940         | 3.564          | 0.510  | 0.958 |
| L_temporalpole             | 1312 | 0.014           | 0.046 | -0.077   | 0.104    | 0.009            | 56.948         | 2.323          | 0.767  | 0.958 |
| L_transversetemporal       | 1315 | 0.025           | 0.065 | -0.103   | 0.153    | 0.025            | 79.204         | 4.809          | 0.701  | 0.958 |
| L_insula                   | 1277 | 0.001           | 0.028 | -0.054   | 0.056    | 0.000            | 0.000          | 1.000          | 0.969  | 0.985 |
| R_bankssts                 | 1275 | -0.045          | 0.028 | -0.100   | 0.009    | 0.000            | 0.000          | 1.000          | 0.105  | 0.958 |
| R_caudalanteriorcingulate  | 1310 | 0.040           | 0.062 | -0.082   | 0.162    | 0.022            | 76.811         | 4.312          | 0.520  | 0.958 |
| R_caudalmiddlefrontal      | 1312 | -0.010          | 0.028 | -0.064   | 0.044    | 0.000            | 0.000          | 1.000          | 0.713  | 0.958 |
| R_cuneus                   | 1283 | -0.020          | 0.055 | -0.128   | 0.088    | 0.015            | 69.577         | 3.287          | 0.717  | 0.958 |
| R_entorhinal               | 1204 | -0.019          | 0.049 | -0.116   | 0.078    | 0.011            | 59.891         | 2.493          | 0.703  | 0.958 |
| R_fusiform                 | 1314 | -0.051          | 0.033 | -0.115   | 0.013    | 0.002            | 20.514         | 1.258          | 0.119  | 0.958 |
| R_inferiorparietal         | 1304 | -0.005          | 0.062 | -0.127   | 0.116    | 0.021            | 76.427         | 4.242          | 0.929  | 0.968 |
| R_inferiortemporal         | 1307 | -0.034          | 0.041 | -0.115   | 0.047    | 0.006            | 46.304         | 1.862          | 0.415  | 0.958 |
| R_isthmuscingulate         | 1309 | -0.046          | 0.028 | -0.100   | 0.008    | 0.000            | 0.000          | 1.000          | 0.097  | 0.958 |
| R_lateraloccipital         | 1311 | -0.011          | 0.053 | -0.114   | 0.092    | 0.013            | 67.023         | 3.032          | 0.834  | 0.960 |
| R_lateralorbitofrontal     | 1312 | -0.039          | 0.055 | -0.148   | 0.069    | 0.016            | 70.208         | 3.357          | 0.476  | 0.958 |
| R_lingual                  | 1303 | -0.021          | 0.050 | -0.119   | 0.077    | 0.011            | 63.143         | 2.713          | 0.677  | 0.958 |
| R_medialorbitofrontal      | 1303 | 0.061           | 0.027 | 0.007    | 0.115    | 0.000            | 0.000          | 1.000          | 0.027  | 0.958 |
| R_middletemporal           | 1303 | -0.029          | 0.028 | -0.083   | 0.025    | 0.000            | 0.000          | 1.000          | 0.293  | 0.958 |

<sup>a</sup> Sites with smoking data include BONNRISC, BONNSPQ, FOR2107-MR, FOR2017-MS, MNC, NYC, ZUR1, ZUR2



| Region                     | N    | Effect Size (r) | SE    | Lower CI | Upper CI | tau <sup>2</sup> | I <sup>2</sup> | H <sup>2</sup> | pvalue | FDRp  |
|----------------------------|------|-----------------|-------|----------|----------|------------------|----------------|----------------|--------|-------|
| R_parahippocampal          | 1317 | -0.039          | 0.059 | -0.154   | 0.077    | 0.019            | 74.005         | 3.847          | 0.511  | 0.958 |
| R_paracentral              | 1309 | -0.012          | 0.063 | -0.135   | 0.112    | 0.022            | 77.599         | 4.464          | 0.854  | 0.960 |
| R_parsopercularis          | 1306 | 0.005           | 0.041 | -0.076   | 0.087    | 0.006            | 46.449         | 1.867          | 0.896  | 0.960 |
| R_parsorbitalis            | 1313 | -0.027          | 0.028 | -0.081   | 0.027    | 0.000            | 0.000          | 1.000          | 0.323  | 0.958 |
| R_parstriangularis         | 1302 | -0.014          | 0.040 | -0.094   | 0.065    | 0.005            | 43.765         | 1.778          | 0.721  | 0.958 |
| R_pericalcarine            | 1279 | 0.009           | 0.047 | -0.083   | 0.101    | 0.009            | 57.406         | 2.348          | 0.846  | 0.960 |
| R_postcentral              | 1291 | -0.062          | 0.039 | -0.138   | 0.014    | 0.004            | 40.122         | 1.670          | 0.112  | 0.958 |
| R_posteriorcingulate       | 1313 | 0.017           | 0.028 | -0.037   | 0.071    | 0.000            | 0.000          | 1.000          | 0.533  | 0.958 |
| R_precentral               | 1297 | -0.047          | 0.054 | -0.152   | 0.058    | 0.014            | 68.000         | 3.125          | 0.382  | 0.958 |
| R_precuneus                | 1312 | -0.027          | 0.055 | -0.136   | 0.081    | 0.015            | 70.344         | 3.372          | 0.621  | 0.958 |
| R_rostralanteriorcingulate | 1289 | 0.019           | 0.041 | -0.062   | 0.100    | 0.006            | 46.023         | 1.853          | 0.641  | 0.958 |
| R_rostralmiddlefrontal     | 1309 | -0.001          | 0.028 | -0.055   | 0.053    | 0.000            | 0.000          | 1.000          | 0.965  | 0.985 |
| R_superiorfrontal          | 1306 | -0.015          | 0.044 | -0.102   | 0.072    | 0.007            | 52.905         | 2.123          | 0.734  | 0.958 |
| R_superiorparietal         | 1309 | -0.055          | 0.052 | -0.157   | 0.048    | 0.013            | 66.805         | 3.013          | 0.295  | 0.958 |
| R_superiortemporal         | 1258 | -0.047          | 0.059 | -0.163   | 0.070    | 0.019            | 73.744         | 3.809          | 0.433  | 0.958 |
| R_supramarginal            | 1278 | -0.029          | 0.028 | -0.084   | 0.025    | 0.000            | 0.000          | 1.000          | 0.293  | 0.958 |
| R_frontalpole              | 1308 | 0.018           | 0.028 | -0.036   | 0.072    | 0.000            | 0.000          | 1.000          | 0.520  | 0.958 |
| R_temporalpole             | 1306 | -0.007          | 0.045 | -0.096   | 0.082    | 0.008            | 55.114         | 2.228          | 0.874  | 0.960 |
| R_transversetemporal       | 1317 | -0.042          | 0.044 | -0.128   | 0.044    | 0.007            | 52.429         | 2.102          | 0.336  | 0.958 |
| R_insula                   | 1252 | -0.023          | 0.065 | -0.152   | 0.105    | 0.025            | 78.400         | 4.630          | 0.721  | 0.958 |
| LThickness                 | 1318 | -0.054          | 0.060 | -0.170   | 0.063    | 0.019            | 74.949         | 3.992          | 0.368  | 0.958 |
| RThickness                 | 1318 | -0.053          | 0.057 | -0.165   | 0.059    | 0.017            | 72.805         | 3.677          | 0.356  | 0.958 |
| LFullSurf                  | 1318 | 0.017           | 0.028 | -0.037   | 0.071    | 0.000            | 0.000          | 1.000          | 0.545  | 0.958 |
| RFullSurf                  | 1318 | 0.013           | 0.028 | -0.041   | 0.067    | 0.000            | 0.000          | 1.000          | 0.636  | 0.958 |

<sup>a</sup> Sites with smoking data include BONNRISC, BONNSPQ, FOR2107-MR, FOR2017-MS, MNC, NYC, ZUR1, ZUR2

Table S10: Effect of Schizotypy Controlling for Smoking Status

| Region                    | N    | Effect Size (r) | SE    | Lower CI | Upper CI | tau <sup>2</sup> | I <sup>2</sup> | H <sup>2</sup> | pvalue | FDRp  |
|---------------------------|------|-----------------|-------|----------|----------|------------------|----------------|----------------|--------|-------|
| L_bankssts                | 1201 | -0.050          | 0.029 | -0.106   | 0.006    | 0.000            | 0.000          | 1.000          | 0.082  | 0.921 |
| L_caudalanteriorcingulate | 1288 | 0.017           | 0.038 | -0.058   | 0.093    | 0.004            | 37.894         | 1.610          | 0.651  | 0.965 |
| L_caudalmiddlefrontal     | 1295 | -0.004          | 0.072 | -0.145   | 0.137    | 0.032            | 82.782         | 5.808          | 0.958  | 0.977 |
| L_cuneus                  | 1266 | -0.010          | 0.049 | -0.106   | 0.086    | 0.010            | 60.220         | 2.514          | 0.841  | 0.965 |

<sup>a</sup> Sites with smoking data include BONNRISC, BONNSPQ, FOR2107-MR, FOR2017-MS, MNC, NYC, ZUR1, ZUR2

| Region                     | N    | Effect Size (r) | SE    | Lower CI | Upper CI | tau <sup>2</sup> | I <sup>2</sup> | H <sup>2</sup> | pvalue | FDRp  |
|----------------------------|------|-----------------|-------|----------|----------|------------------|----------------|----------------|--------|-------|
| L_entorhinal               | 1221 | -0.023          | 0.035 | -0.092   | 0.045    | 0.002            | 24.152         | 1.318          | 0.504  | 0.965 |
| L_fusiform                 | 1299 | -0.062          | 0.043 | -0.146   | 0.022    | 0.007            | 49.546         | 1.982          | 0.145  | 0.965 |
| L_inferioparietal          | 1296 | -0.020          | 0.028 | -0.075   | 0.034    | 0.000            | 0.000          | 1.000          | 0.462  | 0.965 |
| L_inferiortemporal         | 1281 | -0.049          | 0.028 | -0.103   | 0.006    | 0.000            | 0.000          | 1.000          | 0.082  | 0.921 |
| L_isthmuscingulate         | 1300 | -0.020          | 0.037 | -0.092   | 0.052    | 0.003            | 32.997         | 1.492          | 0.578  | 0.965 |
| L_lateraloccipital         | 1301 | -0.021          | 0.048 | -0.116   | 0.074    | 0.010            | 60.491         | 2.531          | 0.661  | 0.965 |
| L_lateralorbitofrontal     | 1303 | -0.004          | 0.041 | -0.084   | 0.076    | 0.005            | 44.674         | 1.807          | 0.925  | 0.965 |
| L_lingual                  | 1295 | -0.014          | 0.035 | -0.083   | 0.056    | 0.003            | 28.634         | 1.401          | 0.701  | 0.965 |
| L_medialorbitofrontal      | 1291 | 0.046           | 0.028 | -0.008   | 0.100    | 0.000            | 0.000          | 1.000          | 0.095  | 0.921 |
| L_middletemporal           | 1238 | -0.017          | 0.028 | -0.072   | 0.039    | 0.000            | 0.033          | 1.000          | 0.549  | 0.965 |
| L parahippocampal          | 1302 | -0.009          | 0.028 | -0.063   | 0.046    | 0.000            | 0.000          | 1.000          | 0.754  | 0.965 |
| L_paracentral              | 1300 | -0.042          | 0.061 | -0.162   | 0.078    | 0.020            | 75.676         | 4.111          | 0.494  | 0.965 |
| L_parsopercularis          | 1292 | -0.048          | 0.034 | -0.116   | 0.019    | 0.002            | 25.734         | 1.347          | 0.162  | 0.965 |
| L_parsorbitalis            | 1297 | -0.007          | 0.028 | -0.062   | 0.047    | 0.000            | 0.000          | 1.000          | 0.792  | 0.965 |
| L_parstriangularis         | 1295 | -0.038          | 0.072 | -0.179   | 0.104    | 0.032            | 83.008         | 5.885          | 0.603  | 0.965 |
| L_pericalcarine            | 1279 | 0.005           | 0.043 | -0.080   | 0.090    | 0.007            | 49.744         | 1.990          | 0.913  | 0.965 |
| L_postcentral              | 1283 | -0.054          | 0.066 | -0.184   | 0.076    | 0.025            | 79.353         | 4.843          | 0.414  | 0.965 |
| L_posteriorcingulate       | 1299 | 0.003           | 0.028 | -0.052   | 0.057    | 0.000            | 0.000          | 1.000          | 0.924  | 0.965 |
| L_precentral               | 1286 | -0.015          | 0.036 | -0.085   | 0.055    | 0.003            | 29.552         | 1.419          | 0.673  | 0.965 |
| L_precuneus                | 1303 | -0.031          | 0.028 | -0.085   | 0.023    | 0.000            | 0.000          | 1.000          | 0.259  | 0.965 |
| L_rostralanteriorcingulate | 1286 | 0.025           | 0.028 | -0.030   | 0.079    | 0.000            | 0.000          | 1.000          | 0.376  | 0.965 |
| L_rostralmiddlefrontal     | 1297 | 0.005           | 0.028 | -0.050   | 0.059    | 0.000            | 0.000          | 1.000          | 0.864  | 0.965 |
| L_superiorfrontal          | 1288 | -0.014          | 0.039 | -0.090   | 0.062    | 0.004            | 38.667         | 1.630          | 0.720  | 0.965 |
| L_superiorparietal         | 1295 | -0.034          | 0.036 | -0.104   | 0.036    | 0.003            | 30.189         | 1.432          | 0.344  | 0.965 |
| L_superiortemporal         | 1204 | -0.048          | 0.033 | -0.113   | 0.017    | 0.002            | 17.319         | 1.209          | 0.148  | 0.965 |
| L_supramarginal            | 1257 | -0.032          | 0.028 | -0.087   | 0.024    | 0.000            | 0.000          | 1.000          | 0.263  | 0.965 |
| L_frontalpole              | 1303 | 0.042           | 0.055 | -0.066   | 0.150    | 0.015            | 69.699         | 3.300          | 0.442  | 0.965 |
| L_temporalpole             | 1300 | 0.006           | 0.046 | -0.084   | 0.096    | 0.008            | 55.975         | 2.271          | 0.897  | 0.965 |
| L_transversetemporal       | 1303 | 0.021           | 0.066 | -0.109   | 0.150    | 0.025            | 79.424         | 4.860          | 0.756  | 0.965 |
| L_insula                   | 1265 | 0.014           | 0.028 | -0.041   | 0.069    | 0.000            | 0.000          | 1.000          | 0.624  | 0.965 |
| R_bankssts                 | 1263 | -0.046          | 0.028 | -0.101   | 0.009    | 0.000            | 0.000          | 1.000          | 0.099  | 0.921 |
| R_caudalanteriorcingulate  | 1298 | 0.064           | 0.052 | -0.038   | 0.165    | 0.013            | 65.301         | 2.882          | 0.219  | 0.965 |
| R_caudalmiddlefrontal      | 1300 | -0.001          | 0.028 | -0.055   | 0.053    | 0.000            | 0.000          | 1.000          | 0.970  | 0.977 |

<sup>a</sup> Sites with smoking data include BONNRISC, BONNSPQ, FOR2107-MR, FOR2017-MS, MNC, NYC, ZUR1, ZUR2

| Region                     | N    | Effect Size (r) | SE    | Lower CI | Upper CI | tau <sup>2</sup> | I <sup>2</sup> | H <sup>2</sup> | pvalue | FDRp  |
|----------------------------|------|-----------------|-------|----------|----------|------------------|----------------|----------------|--------|-------|
| R_cuneus                   | 1272 | -0.037          | 0.059 | -0.152   | 0.078    | 0.018            | 72.731         | 3.667          | 0.532  | 0.965 |
| R_entorhinal               | 1194 | -0.018          | 0.051 | -0.117   | 0.081    | 0.011            | 61.223         | 2.579          | 0.724  | 0.965 |
| R_fusiform                 | 1302 | -0.048          | 0.028 | -0.102   | 0.006    | 0.000            | 0.000          | 1.000          | 0.080  | 0.921 |
| R_inferiorparietal         | 1292 | 0.005           | 0.052 | -0.096   | 0.106    | 0.012            | 64.730         | 2.835          | 0.926  | 0.965 |
| R_inferiortemporal         | 1295 | -0.030          | 0.043 | -0.113   | 0.054    | 0.006            | 48.554         | 1.944          | 0.482  | 0.965 |
| R_isthmuscingulate         | 1297 | -0.051          | 0.028 | -0.105   | 0.003    | 0.000            | 0.000          | 1.000          | 0.067  | 0.921 |
| R_lateraloccipital         | 1299 | -0.018          | 0.050 | -0.117   | 0.080    | 0.011            | 62.851         | 2.692          | 0.717  | 0.965 |
| R_lateralorbitofrontal     | 1300 | -0.025          | 0.052 | -0.127   | 0.077    | 0.013            | 65.511         | 2.899          | 0.634  | 0.965 |
| R_lingual                  | 1292 | -0.021          | 0.052 | -0.123   | 0.081    | 0.013            | 65.559         | 2.904          | 0.683  | 0.965 |
| R_medialorbitofrontal      | 1291 | 0.076           | 0.028 | 0.022    | 0.130    | 0.000            | 0.000          | 1.000          | 0.006  | 0.408 |
| R_middletemporal           | 1291 | -0.024          | 0.028 | -0.078   | 0.030    | 0.000            | 0.000          | 1.000          | 0.389  | 0.965 |
| R parahippocampal          | 1305 | -0.012          | 0.050 | -0.110   | 0.085    | 0.011            | 62.527         | 2.669          | 0.804  | 0.965 |
| R_paracentral              | 1297 | 0.002           | 0.054 | -0.104   | 0.109    | 0.014            | 68.688         | 3.194          | 0.969  | 0.977 |
| R_parsopercularis          | 1294 | 0.013           | 0.036 | -0.057   | 0.084    | 0.003            | 30.281         | 1.434          | 0.712  | 0.965 |
| R_parsorbitalis            | 1301 | -0.024          | 0.028 | -0.079   | 0.030    | 0.000            | 0.000          | 1.000          | 0.377  | 0.965 |
| R_parstriangularis         | 1290 | -0.022          | 0.044 | -0.108   | 0.063    | 0.007            | 50.870         | 2.035          | 0.609  | 0.965 |
| R_pericalcarine            | 1267 | 0.008           | 0.051 | -0.091   | 0.107    | 0.012            | 62.691         | 2.680          | 0.872  | 0.965 |
| R_postcentral              | 1279 | -0.057          | 0.038 | -0.131   | 0.016    | 0.004            | 35.290         | 1.545          | 0.127  | 0.965 |
| R_posteriorcingulate       | 1301 | 0.027           | 0.028 | -0.027   | 0.081    | 0.000            | 0.000          | 1.000          | 0.324  | 0.965 |
| R_precentral               | 1285 | -0.036          | 0.041 | -0.116   | 0.044    | 0.005            | 43.598         | 1.773          | 0.376  | 0.965 |
| R_precuneus                | 1300 | -0.027          | 0.052 | -0.129   | 0.074    | 0.013            | 65.343         | 2.885          | 0.599  | 0.965 |
| R_rostralanteriorcingulate | 1277 | 0.028           | 0.042 | -0.054   | 0.110    | 0.006            | 46.562         | 1.871          | 0.505  | 0.965 |
| R_rostralmiddlefrontal     | 1297 | 0.004           | 0.028 | -0.050   | 0.058    | 0.000            | 0.000          | 1.000          | 0.878  | 0.965 |
| R_superiorfrontal          | 1294 | -0.014          | 0.049 | -0.111   | 0.083    | 0.011            | 61.596         | 2.604          | 0.773  | 0.965 |
| R_superiorparietal         | 1297 | -0.040          | 0.039 | -0.116   | 0.035    | 0.004            | 38.682         | 1.631          | 0.298  | 0.965 |
| R_superiortemporal         | 1247 | -0.024          | 0.048 | -0.118   | 0.071    | 0.010            | 58.647         | 2.418          | 0.621  | 0.965 |
| R_supramarginal            | 1266 | -0.022          | 0.028 | -0.077   | 0.033    | 0.000            | 0.000          | 1.000          | 0.440  | 0.965 |
| R_frontalpole              | 1296 | 0.017           | 0.028 | -0.037   | 0.072    | 0.000            | 0.000          | 1.000          | 0.538  | 0.965 |
| R_temporalpole             | 1294 | -0.008          | 0.045 | -0.097   | 0.081    | 0.008            | 54.394         | 2.193          | 0.864  | 0.965 |
| R_transversetemporal       | 1305 | -0.028          | 0.036 | -0.098   | 0.042    | 0.003            | 29.754         | 1.424          | 0.435  | 0.965 |
| R_insula                   | 1240 | -0.011          | 0.066 | -0.140   | 0.118    | 0.025            | 78.244         | 4.596          | 0.870  | 0.965 |
| LThickness                 | 1306 | -0.042          | 0.051 | -0.142   | 0.057    | 0.012            | 64.337         | 2.804          | 0.404  | 0.965 |
| RThickness                 | 1306 | -0.040          | 0.050 | -0.137   | 0.057    | 0.011            | 62.465         | 2.664          | 0.419  | 0.965 |

<sup>a</sup> Sites with smoking data include BONNRISC, BONNSPQ, FOR2107-MR, FOR2017-MS, MNC, NYC, ZUR1, ZUR2

| Region    | N    | Effect Size (r) | SE    | Lower CI | Upper CI | tau <sup>2</sup> | I <sup>2</sup> | H <sup>2</sup> | pvalue | FDRp  |
|-----------|------|-----------------|-------|----------|----------|------------------|----------------|----------------|--------|-------|
| LFullSurf | 1306 | 0.018           | 0.028 | -0.036   | 0.073    | 0.000            | 0.000          | 1.000          | 0.504  | 0.965 |
| RFullSurf | 1306 | 0.013           | 0.028 | -0.041   | 0.067    | 0.000            | 0.000          | 1.000          | 0.639  | 0.965 |

<sup>a</sup> Sites with smoking data include BONNRISC, BONNSPQ, FOR2107-MR, FOR2017-MS, MNC, NYC, ZUR1, ZUR2

Table S11: Effect of Schizotypy in Subgroup with Smoking Data

| Region   | N    | Effect Size (r) | SE    | Lower CI | Upper CI | tau <sup>2</sup> | I <sup>2</sup> | H <sup>2</sup> | pvalue | FDRp  |
|----------|------|-----------------|-------|----------|----------|------------------|----------------|----------------|--------|-------|
| LLatVent | 1334 | 0.023           | 0.039 | -0.053   | 0.100    | 0.005            | 42.665         | 1.744          | 0.550  | 0.877 |
| RLatVent | 1334 | 0.006           | 0.042 | -0.076   | 0.089    | 0.006            | 49.716         | 1.989          | 0.885  | 0.996 |
| Lthal    | 1325 | 0.004           | 0.066 | -0.126   | 0.134    | 0.026            | 80.206         | 5.052          | 0.954  | 0.996 |
| Lcaud    | 1326 | 0.035           | 0.044 | -0.051   | 0.122    | 0.007            | 53.415         | 2.147          | 0.421  | 0.877 |
| Lput     | 1292 | 0.003           | 0.031 | -0.059   | 0.064    | 0.001            | 15.079         | 1.178          | 0.934  | 0.996 |
| Lpal     | 1223 | -0.035          | 0.029 | -0.092   | 0.021    | 0.000            | 0.000          | 1.000          | 0.215  | 0.877 |
| Lhippo   | 1326 | 0.016           | 0.041 | -0.063   | 0.095    | 0.005            | 45.463         | 1.834          | 0.692  | 0.877 |
| Lamyg    | 1320 | 0.025           | 0.027 | -0.029   | 0.079    | 0.000            | 0.000          | 1.000          | 0.364  | 0.877 |
| Laccumb  | 1318 | 0.017           | 0.042 | -0.066   | 0.099    | 0.006            | 48.804         | 1.953          | 0.694  | 0.877 |
| Rthal    | 1334 | 0.050           | 0.069 | -0.084   | 0.185    | 0.029            | 81.830         | 5.504          | 0.464  | 0.877 |
| Rcaud    | 1330 | 0.027           | 0.052 | -0.075   | 0.129    | 0.013            | 66.927         | 3.024          | 0.607  | 0.877 |
| Rput     | 1316 | -0.008          | 0.033 | -0.072   | 0.056    | 0.002            | 20.288         | 1.255          | 0.802  | 0.962 |
| Rpal     | 1315 | -0.035          | 0.043 | -0.119   | 0.048    | 0.007            | 50.506         | 2.020          | 0.408  | 0.877 |
| Rhippo   | 1329 | 0.023           | 0.030 | -0.036   | 0.082    | 0.001            | 12.474         | 1.143          | 0.445  | 0.877 |
| Ramyg    | 1315 | 0.031           | 0.027 | -0.023   | 0.085    | 0.000            | 0.000          | 1.000          | 0.256  | 0.877 |
| Raccumb  | 1319 | 0.024           | 0.052 | -0.078   | 0.126    | 0.013            | 66.713         | 3.004          | 0.649  | 0.877 |

<sup>a</sup> Sites with smoking data include BONNRISC, BONNSPQ, FOR2107-MR, FOR2017-MS, MNC, NYC, ZUR1, ZUR2

Table S12: Effect of Schizotypy Controlling for Smoking Status

| Region   | N    | Effect Size (r) | SE    | Lower CI | Upper CI | tau <sup>2</sup> | I <sup>2</sup> | H <sup>2</sup> | pvalue | FDRp  |
|----------|------|-----------------|-------|----------|----------|------------------|----------------|----------------|--------|-------|
| LLatVent | 1137 | 0.004           | 0.037 | -0.069   | 0.077    | 0.002            | 25.333         | 1.339          | 0.914  | 0.962 |
| RLatVent | 1137 | 0.014           | 0.056 | -0.095   | 0.123    | 0.012            | 64.227         | 2.795          | 0.799  | 0.962 |

<sup>a</sup> Sites with smoking data include BONNRISC, BONNSPQ, FOR2107-MR, FOR2017-MS, MNC, NYC, ZUR1, ZUR2

| Region  | N    | Effect Size (r) | SE    | Lower CI | Upper CI | tau <sup>2</sup> | I <sup>2</sup> | H <sup>2</sup> | pvalue | FDRp  |
|---------|------|-----------------|-------|----------|----------|------------------|----------------|----------------|--------|-------|
| Lthal   | 1137 | 0.004           | 0.082 | -0.157   | 0.165    | 0.037            | 84.505         | 6.454          | 0.962  | 0.962 |
| Lcaud   | 1129 | 0.028           | 0.048 | -0.065   | 0.122    | 0.007            | 50.868         | 2.035          | 0.554  | 0.962 |
| Lput    | 1098 | -0.019          | 0.030 | -0.078   | 0.040    | 0.000            | 0.000          | 1.000          | 0.530  | 0.962 |
| Lpal    | 1034 | -0.030          | 0.031 | -0.091   | 0.031    | 0.000            | 0.000          | 1.000          | 0.333  | 0.962 |
| Lhippo  | 1132 | -0.008          | 0.030 | -0.066   | 0.051    | 0.000            | 0.000          | 1.000          | 0.794  | 0.962 |
| Lamyg   | 1127 | -0.003          | 0.030 | -0.061   | 0.056    | 0.000            | 0.000          | 1.000          | 0.926  | 0.962 |
| Laccumb | 1123 | 0.009           | 0.050 | -0.090   | 0.107    | 0.009            | 55.603         | 2.252          | 0.859  | 0.962 |
| Rthal   | 1137 | 0.059           | 0.088 | -0.114   | 0.233    | 0.045            | 86.955         | 7.666          | 0.501  | 0.962 |
| Rcaud   | 1133 | 0.015           | 0.057 | -0.097   | 0.127    | 0.013            | 65.786         | 2.923          | 0.797  | 0.962 |
| Rput    | 1120 | -0.036          | 0.030 | -0.095   | 0.023    | 0.000            | 0.000          | 1.000          | 0.228  | 0.962 |
| Rpal    | 1119 | -0.036          | 0.037 | -0.107   | 0.036    | 0.002            | 22.917         | 1.297          | 0.329  | 0.962 |
| Rhippo  | 1136 | -0.031          | 0.030 | -0.089   | 0.027    | 0.000            | 0.000          | 1.000          | 0.295  | 0.962 |
| Ramyg   | 1122 | 0.014           | 0.030 | -0.044   | 0.072    | 0.000            | 0.000          | 1.000          | 0.641  | 0.962 |
| Raccumb | 1124 | 0.014           | 0.050 | -0.084   | 0.112    | 0.009            | 55.242         | 2.234          | 0.781  | 0.962 |

<sup>a</sup> Sites with smoking data include BONNRISC, BONNSPQ, FOR2107-MR, FOR2017-MS, MNC, NYC, ZUR1, ZUR2

Table S13: Schizotypy Questionnaire Moderator

| Region                    | Q         | pvalue    | df |
|---------------------------|-----------|-----------|----|
| L_bankssts                | 0.1210944 | 0.7278506 | 1  |
| L_caudalanteriorcingulate | 0.0074802 | 0.9310785 | 1  |
| L_caudalmiddlefrontal     | 0.1761127 | 0.6747354 | 1  |
| L_cuneus                  | 0.5012191 | 0.4789649 | 1  |
| L_entorhinal              | 0.0052265 | 0.9423674 | 1  |
| L_fusiform                | 0.5831693 | 0.4450727 | 1  |
| L_inferiorparietal        | 0.1734402 | 0.6770723 | 1  |
| L_inferiortemporal        | 0.0547494 | 0.8149959 | 1  |
| L_isthmuscingulate        | 0.0493176 | 0.8242549 | 1  |
| L_lateraloccipital        | 0.0250159 | 0.8743275 | 1  |
| L_lateralorbitofrontal    | 4.9187359 | 0.0265669 | 1  |
| L_lingual                 | 0.1367613 | 0.7115221 | 1  |
| L_medialorbitofrontal     | 0.1520148 | 0.6966173 | 1  |
| L_middletemporal          | 0.1771360 | 0.6738461 | 1  |
| L parahippocampal         | 1.7025615 | 0.1919533 | 1  |

<sup>a</sup> Uncorrected p-values. All results were non-significant (all pFDR >.05) after FDR correction.

| Region                     | Q         | pvalue    | df |
|----------------------------|-----------|-----------|----|
| L_paracentral              | 0.0618448 | 0.8036036 | 1  |
| L_parsopercularis          | 0.0890043 | 0.7654469 | 1  |
| L_parsorbitalis            | 0.0007130 | 0.9786968 | 1  |
| L_parstriangularis         | 0.0397984 | 0.8418753 | 1  |
| L_pericalcarine            | 0.2736839 | 0.6008712 | 1  |
| L_postcentral              | 0.3397632 | 0.5599660 | 1  |
| L_posteriorcingulate       | 0.4695531 | 0.4931928 | 1  |
| L_precentral               | 0.1011104 | 0.7505012 | 1  |
| L_precuneus                | 0.7395842 | 0.3897941 | 1  |
| L_rostralanteriorcingulate | 0.5078078 | 0.4760894 | 1  |
| L_rostralmiddlefrontal     | 0.1179889 | 0.7312260 | 1  |
| L_superiorfrontal          | 0.0942487 | 0.7588437 | 1  |
| L_superiorparietal         | 0.0020676 | 0.9637321 | 1  |
| L_superiortemporal         | 1.4838901 | 0.2231669 | 1  |
| L_supramarginal            | 0.0085677 | 0.9262515 | 1  |
| L_frontalpole              | 0.1505594 | 0.6980014 | 1  |
| L_temporalpole             | 1.3129276 | 0.2518653 | 1  |
| L_transversetemporal       | 0.0342318 | 0.8532146 | 1  |
| L_insula                   | 0.0760752 | 0.7826883 | 1  |
| R_bankssts                 | 0.0178818 | 0.8936217 | 1  |
| R_caudalanteriorcingulate  | 3.0392794 | 0.0812720 | 1  |
| R_caudalmiddlefrontal      | 1.4702307 | 0.2253093 | 1  |
| R_cuneus                   | 0.7697907 | 0.3802818 | 1  |
| R_entorhinal               | 0.0016672 | 0.9674300 | 1  |
| R_fusiform                 | 0.8415015 | 0.3589677 | 1  |
| R_inferiorparietal         | 0.4163542 | 0.5187618 | 1  |
| R_inferiortemporal         | 0.0284832 | 0.8659777 | 1  |
| R_isthmuscingulate         | 2.4462291 | 0.1178076 | 1  |
| R_lateraloccipital         | 0.0014794 | 0.9693182 | 1  |
| R_lateralorbitofrontal     | 0.0004730 | 0.9826490 | 1  |
| R_lingual                  | 0.0499329 | 0.8231800 | 1  |
| R_medialorbitofrontal      | 0.4599144 | 0.4976640 | 1  |
| R_middletemporal           | 0.3277040 | 0.5670142 | 1  |

<sup>a</sup> Uncorrected p-values. All results were non-significant (all pFDR >.05) after FDR correction.

| Region                     | Q         | pvalue    | df |
|----------------------------|-----------|-----------|----|
| R_parahippocampal          | 0.0794971 | 0.7779801 | 1  |
| R_paracentral              | 1.0389130 | 0.3080744 | 1  |
| R_parsopercularis          | 0.4811284 | 0.4879116 | 1  |
| R_parsorbitalis            | 0.7505329 | 0.3863076 | 1  |
| R_parstriangularis         | 0.3795819 | 0.5378271 | 1  |
| R_pericalcarine            | 0.0985043 | 0.7536319 | 1  |
| R_postcentral              | 1.1597696 | 0.2815133 | 1  |
| R_posteriorcingulate       | 0.1642859 | 0.6852409 | 1  |
| R_precentral               | 0.5599779 | 0.4542691 | 1  |
| R_precuneus                | 0.4096600 | 0.5221421 | 1  |
| R_rostralanteriorcingulate | 0.3231411 | 0.5697261 | 1  |
| R_rostralmiddlefrontal     | 0.1737071 | 0.6768380 | 1  |
| R_superiorfrontal          | 0.4339876 | 0.5100387 | 1  |
| R_superiorparietal         | 1.4224680 | 0.2329976 | 1  |
| R_superiortemporal         | 0.2801484 | 0.5966039 | 1  |
| R_supramarginal            | 0.3026792 | 0.5822077 | 1  |
| R_frontalpole              | 1.8713180 | 0.1713242 | 1  |
| R_temporalpole             | 0.5870206 | 0.4435736 | 1  |
| R_transversetemporal       | 0.1103299 | 0.7397689 | 1  |
| R_insula                   | 0.3142672 | 0.5750734 | 1  |
| LThickness                 | 0.0512076 | 0.8209751 | 1  |
| RThickness                 | 0.3369752 | 0.5615804 | 1  |
| LFullSurf                  | 0.5240306 | 0.4691274 | 1  |
| RFullSurf                  | 1.7808076 | 0.1820502 | 1  |

<sup>a</sup> Uncorrected p-values. All results were non-significant (all pFDR >.05) after FDR correction.

Table S14: Scanner Field Strength Moderator

| Region                    | Q         | pvalue    | df |
|---------------------------|-----------|-----------|----|
| L_bankssts                | 0.0006394 | 0.9798269 | 1  |
| L_caudalanteriorcingulate | 0.2951084 | 0.5869654 | 1  |
| L_caudalmiddlefrontal     | 0.2167744 | 0.6415087 | 1  |
| L_cuneus                  | 4.2191209 | 0.0399709 | 1  |
| L_entorhinal              | 0.0104878 | 0.9184313 | 1  |

<sup>a</sup> Uncorrected p-values. All results were non-significant (all pFDR >.05) after FDR correction.

| Region                     | Q          | pvalue    | df |
|----------------------------|------------|-----------|----|
| L_fusiform                 | 0.1792749  | 0.6719971 | 1  |
| L_inferiorparietal         | 0.0000107  | 0.9973896 | 1  |
| L_inferiortemporal         | 3.0161160  | 0.0824407 | 1  |
| L_isthmuscingulate         | 2.5115878  | 0.1130120 | 1  |
| L_lateraloccipital         | 1.4691143  | 0.2254855 | 1  |
| L_lateralorbitofrontal     | 0.6764936  | 0.4107968 | 1  |
| L_lingual                  | 0.0012561  | 0.9717282 | 1  |
| L_medialorbitofrontal      | 0.2222077  | 0.6373629 | 1  |
| L_middletemporal           | 12.7054879 | 0.0003646 | 1  |
| L parahippocampal          | 4.7644181  | 0.0290539 | 1  |
| L_paracentral              | 0.0021468  | 0.9630445 | 1  |
| L_parsopercularis          | 0.0235230  | 0.8781047 | 1  |
| L_parsorbitalis            | 1.6440908  | 0.1997651 | 1  |
| L_parstriangularis         | 0.1669503  | 0.6828365 | 1  |
| L_pericalcarine            | 0.5758518  | 0.4479429 | 1  |
| L_postcentral              | 5.9894980  | 0.0143913 | 1  |
| L_posteriorcingulate       | 0.0137002  | 0.9068223 | 1  |
| L_precentral               | 0.2194271  | 0.6394768 | 1  |
| L_precuneus                | 0.1527921  | 0.6958813 | 1  |
| L_rostralanteriorcingulate | 0.4284796  | 0.5127359 | 1  |
| L_rostralmiddlefrontal     | 1.4619095  | 0.2266265 | 1  |
| L_superiorfrontal          | 0.0059823  | 0.9383488 | 1  |
| L_superiorparietal         | 0.5162971  | 0.4724255 | 1  |
| L_superiortemporal         | 0.8173949  | 0.3659429 | 1  |
| L_supramarginal            | 0.6481216  | 0.4207850 | 1  |
| L_frontalpole              | 0.6506901  | 0.4198661 | 1  |
| L_temporalpole             | 0.0805663  | 0.7765314 | 1  |
| L_transversetemporal       | 1.0427502  | 0.3071827 | 1  |
| L_insula                   | 0.1212956  | 0.7276336 | 1  |
| R_bankssts                 | 0.8296194  | 0.3623826 | 1  |
| R_caudalanteriorcingulate  | 0.0989807  | 0.7530563 | 1  |
| R_caudalmiddlefrontal      | 1.1570111  | 0.2820863 | 1  |
| R_cuneus                   | 1.2530542  | 0.2629699 | 1  |

<sup>a</sup> Uncorrected p-values. All results were non-significant (all pFDR >.05) after FDR correction.



| <b>Region</b>              | <b>Q</b>   | <b>pvalue</b> | <b>df</b> |
|----------------------------|------------|---------------|-----------|
| R_entorhinal               | 0.0021527  | 0.9629933     | 1         |
| R_fusiform                 | 0.3973368  | 0.5284679     | 1         |
| R_inferiorparietal         | 0.0333550  | 0.8550855     | 1         |
| R_inferiortemporal         | 0.1584371  | 0.6905995     | 1         |
| R_isthmuscingulate         | 6.6778748  | 0.0097617     | 1         |
| R_lateraloccipital         | 0.2195640  | 0.6393723     | 1         |
| R_lateralorbitofrontal     | 0.7139524  | 0.3981348     | 1         |
| R_lingual                  | 1.2770981  | 0.2584393     | 1         |
| R_medialorbitofrontal      | 0.3690545  | 0.5435201     | 1         |
| R_middletemporal           | 0.6875686  | 0.4069926     | 1         |
| R parahippocampal          | 14.7253803 | 0.0001244     | 1         |
| R_paracentral              | 0.0709597  | 0.7899445     | 1         |
| R_parsopercularis          | 0.9496323  | 0.3298129     | 1         |
| R_parsorbitalis            | 2.2656379  | 0.1322717     | 1         |
| R_parstriangularis         | 0.1007702  | 0.7509073     | 1         |
| R_pericalcarine            | 0.6426488  | 0.4227533     | 1         |
| R_postcentral              | 0.5802581  | 0.4462112     | 1         |
| R_posteriorcingulate       | 6.7674999  | 0.0092833     | 1         |
| R_precentral               | 0.0011865  | 0.9725223     | 1         |
| R_precuneus                | 0.2293018  | 0.6320420     | 1         |
| R_rostralanteriorcingulate | 0.2940208  | 0.5876554     | 1         |
| R_rostralmiddlefrontal     | 3.2650897  | 0.0707692     | 1         |
| R_superiorfrontal          | 0.3575370  | 0.5498773     | 1         |
| R_superiorparietal         | 0.1896814  | 0.6631819     | 1         |
| R_superiortemporal         | 0.0927115  | 0.7607580     | 1         |
| R_supramarginal            | 0.6270878  | 0.4284255     | 1         |
| R_frontalpole              | 0.0470704  | 0.8282418     | 1         |
| R_temporalpole             | 0.3282038  | 0.5667187     | 1         |
| R_transversetemporal       | 0.0315378  | 0.8590459     | 1         |
| R_insula                   | 0.0007913  | 0.9775582     | 1         |
| LThickness                 | 0.0846771  | 0.7710564     | 1         |
| RThickness                 | 0.1418164  | 0.7064819     | 1         |
| LFullSurf                  | 0.0004285  | 0.9834853     | 1         |

<sup>a</sup> Uncorrected p-values. All results were non-significant (all pFDR >.05) after FDR correction.

| Region    | Q         | pvalue    | df |
|-----------|-----------|-----------|----|
| RFullSurf | 0.1010385 | 0.7505869 | 1  |

<sup>a</sup> Uncorrected p-values. All results were non-significant (all pFDR >.05) after FDR correction.

Table S15: Scanner Number Moderator

| Region                     | Q         | pvalue    | df |
|----------------------------|-----------|-----------|----|
| L_bankssts                 | 0.0017196 | 0.9669223 | 1  |
| L_caudalanteriorcingulate  | 0.2855258 | 0.5931020 | 1  |
| L_caudalmiddlefrontal      | 0.0159449 | 0.8995158 | 1  |
| L_cuneus                   | 1.7940219 | 0.1804369 | 1  |
| L_entorhinal               | 0.5064899 | 0.4766623 | 1  |
| L_fusiform                 | 0.0155664 | 0.9007093 | 1  |
| L_inferiorparietal         | 0.0091129 | 0.9239485 | 1  |
| L_inferiortemporal         | 1.8208068 | 0.1772173 | 1  |
| L_isthmuscingulate         | 0.7260419 | 0.3941692 | 1  |
| L_lateraloccipital         | 0.7061612 | 0.4007212 | 1  |
| L_lateralorbitofrontal     | 0.6465127 | 0.4213623 | 1  |
| L_lingual                  | 0.0221572 | 0.8816696 | 1  |
| L_medialorbitofrontal      | 0.0599806 | 0.8065267 | 1  |
| L_middletemporal           | 2.5910831 | 0.1074668 | 1  |
| L parahippocampal          | 1.7577107 | 0.1849103 | 1  |
| L_paracentral              | 0.9833386 | 0.3213759 | 1  |
| L_parsopercularis          | 0.0287153 | 0.8654380 | 1  |
| L_parsorbitalis            | 1.9717844 | 0.1602586 | 1  |
| L_parstriangularis         | 0.0790648 | 0.7785687 | 1  |
| L_pericalcarine            | 0.2553202 | 0.6133536 | 1  |
| L_postcentral              | 0.7877598 | 0.3747784 | 1  |
| L_posteriorcingulate       | 0.0759918 | 0.7828045 | 1  |
| L_precentral               | 0.2840249 | 0.5940752 | 1  |
| L_precuneus                | 1.8770804 | 0.1706664 | 1  |
| L_rostralanteriorcingulate | 2.0579533 | 0.1514134 | 1  |
| L_rostralmiddlefrontal     | 0.1207963 | 0.7281724 | 1  |
| L_superiorfrontal          | 0.0120182 | 0.9127046 | 1  |
| L_superiorparietal         | 0.0055395 | 0.9406702 | 1  |

<sup>a</sup> Uncorrected p-values. All results were non-significant (all pFDR >.05) after FDR correction.

| Region                      | Q          | pvalue    | df |
|-----------------------------|------------|-----------|----|
| L_superiortemporal          | 0.0800926  | 0.7771720 | 1  |
| L_supramarginal             | 2.2609348  | 0.1326740 | 1  |
| L_frontalpole               | 0.8267064  | 0.3632266 | 1  |
| L_temporalpole              | 0.3910813  | 0.5317316 | 1  |
| L_transversetemporal        | 0.0209110  | 0.8850217 | 1  |
| L_insula                    | 2.1858419  | 0.1392849 | 1  |
| R_bankssts                  | 1.5433915  | 0.2141137 | 1  |
| R_caudalanteriorcingulate   | 0.2579515  | 0.6115310 | 1  |
| R_caudalmiddlefrontal       | 1.8352235  | 0.1755118 | 1  |
| R_cuneus                    | 0.8475660  | 0.3572418 | 1  |
| R_entorhinal                | 0.1257431  | 0.7228872 | 1  |
| R_fusiform                  | 0.5220107  | 0.4699852 | 1  |
| R_inferiorparietal          | 1.7477582  | 0.1861588 | 1  |
| R_inferiortemporal          | 0.0096758  | 0.9216418 | 1  |
| R_isthmuscingulate          | 0.3380831  | 0.5609378 | 1  |
| R_lateraloccipital          | 2.4199666  | 0.1197975 | 1  |
| R_lateralorbitofrontal      | 0.7684165  | 0.3807074 | 1  |
| R_lingual                   | 1.3826518  | 0.2396500 | 1  |
| R_medialorbitofrontal       | 0.0545302  | 0.8153600 | 1  |
| R_middletemporal            | 0.3064360  | 0.5798755 | 1  |
| R parahippocampal           | 10.6294360 | 0.0011130 | 1  |
| R_paracentral               | 0.6496865  | 0.4202248 | 1  |
| R_parsopercularis           | 2.7693669  | 0.0960842 | 1  |
| R_parsorbitalis             | 0.4203147  | 0.5167800 | 1  |
| R_parstriangularis          | 0.3428816  | 0.5581706 | 1  |
| R_pericalcarine             | 0.6571204  | 0.4175784 | 1  |
| R_postcentral               | 2.0449024  | 0.1527168 | 1  |
| R_posteriorcingulate        | 0.2225212  | 0.6371256 | 1  |
| R_precentral                | 1.6571356  | 0.1979905 | 1  |
| R_precuneus                 | 0.1327091  | 0.7156395 | 1  |
| R_rostral anteriorcingulate | 0.0966012  | 0.7559470 | 1  |
| R_rostralmiddlefrontal      | 0.1302150  | 0.7182092 | 1  |
| R_superiorfrontal           | 0.4413176  | 0.5064872 | 1  |

<sup>a</sup> Uncorrected p-values. All results were non-significant (all pFDR >.05) after FDR correction.

| Region               | Q         | pvalue    | df |
|----------------------|-----------|-----------|----|
| R_superiorparietal   | 0.1617291 | 0.6875696 | 1  |
| R_superiortemporal   | 1.6381920 | 0.2005737 | 1  |
| R_supramarginal      | 0.0491681 | 0.8245172 | 1  |
| R_frontalpole        | 0.0188587 | 0.8907723 | 1  |
| R_temporalpole       | 0.7669973 | 0.3811476 | 1  |
| R_transversetemporal | 1.2202363 | 0.2693143 | 1  |
| R_insula             | 0.2308803 | 0.6308719 | 1  |
| LThickness           | 0.4583218 | 0.4984093 | 1  |
| RThickness           | 0.5620012 | 0.4534550 | 1  |
| LFullSurf            | 0.8720794 | 0.3503803 | 1  |
| RFullSurf            | 1.0719482 | 0.3005058 | 1  |

<sup>a</sup> Uncorrected p-values. All results were non-significant (all pFDR >.05) after FDR correction.

Table S16: FreeSurfer Version Moderator

| Region                    | Q          | pvalue    | df |
|---------------------------|------------|-----------|----|
| L_bankssts                | 0.0006394  | 0.9798269 | 1  |
| L_caudalanteriorcingulate | 0.2951084  | 0.5869654 | 1  |
| L_caudalmiddlefrontal     | 0.2167744  | 0.6415087 | 1  |
| L_cuneus                  | 4.2191209  | 0.0399709 | 1  |
| L_entorhinal              | 0.0104878  | 0.9184313 | 1  |
| L_fusiform                | 0.1792749  | 0.6719971 | 1  |
| L_inferiorparietal        | 0.0000107  | 0.9973896 | 1  |
| L_inferiortemporal        | 3.0161160  | 0.0824407 | 1  |
| L_isthmuscingulate        | 2.5115878  | 0.1130120 | 1  |
| L_lateraloccipital        | 1.4691143  | 0.2254855 | 1  |
| L_lateralorbitofrontal    | 0.6764936  | 0.4107968 | 1  |
| L_lingual                 | 0.0012561  | 0.9717282 | 1  |
| L_medialorbitofrontal     | 0.2222077  | 0.6373629 | 1  |
| L_middletemporal          | 12.7054879 | 0.0003646 | 1  |
| L parahippocampal         | 4.7644181  | 0.0290539 | 1  |
| L_paracentral             | 0.0021468  | 0.9630445 | 1  |
| L_parsopercularis         | 0.0235230  | 0.8781047 | 1  |
| L_parsorbitalis           | 1.6440908  | 0.1997651 | 1  |

<sup>a</sup> Uncorrected p-values. All results were non-significant (all pFDR >.05) after FDR correction.

| Region                     | Q          | pvalue    | df |
|----------------------------|------------|-----------|----|
| L_parstriangularis         | 0.1669503  | 0.6828365 | 1  |
| L_pericalcarine            | 0.5758518  | 0.4479429 | 1  |
| L_postcentral              | 5.9894980  | 0.0143913 | 1  |
| L_posteriorcingulate       | 0.0137002  | 0.9068223 | 1  |
| L_precentral               | 0.2194271  | 0.6394768 | 1  |
| L_precuneus                | 0.1527921  | 0.6958813 | 1  |
| L_rostralanteriorcingulate | 0.4284796  | 0.5127359 | 1  |
| L_rostralmiddlefrontal     | 1.4619095  | 0.2266265 | 1  |
| L_superiorfrontal          | 0.0059823  | 0.9383488 | 1  |
| L_superiorparietal         | 0.5162971  | 0.4724255 | 1  |
| L_superiortemporal         | 0.8173949  | 0.3659429 | 1  |
| L_supramarginal            | 0.6481216  | 0.4207850 | 1  |
| L_frontalpole              | 0.6506901  | 0.4198661 | 1  |
| L_temporalpole             | 0.0805663  | 0.7765314 | 1  |
| L_transversetemporal       | 1.0427502  | 0.3071827 | 1  |
| L_insula                   | 0.1212956  | 0.7276336 | 1  |
| R_bankssts                 | 0.8296194  | 0.3623826 | 1  |
| R_caudalanteriorcingulate  | 0.0989807  | 0.7530563 | 1  |
| R_caudalmiddlefrontal      | 1.1570111  | 0.2820863 | 1  |
| R_cuneus                   | 1.2530542  | 0.2629699 | 1  |
| R_entorhinal               | 0.0021527  | 0.9629933 | 1  |
| R_fusiform                 | 0.3973368  | 0.5284679 | 1  |
| R_inferiorparietal         | 0.0333550  | 0.8550855 | 1  |
| R_inferiortemporal         | 0.1584371  | 0.6905995 | 1  |
| R_isthmuscingulate         | 6.6778748  | 0.0097617 | 1  |
| R_lateraloccipital         | 0.2195640  | 0.6393723 | 1  |
| R_lateralorbitofrontal     | 0.7139524  | 0.3981348 | 1  |
| R_lingual                  | 1.2770981  | 0.2584393 | 1  |
| R_medialorbitofrontal      | 0.3690545  | 0.5435201 | 1  |
| R_middletemporal           | 0.6875686  | 0.4069926 | 1  |
| R parahippocampal          | 14.7253803 | 0.0001244 | 1  |
| R_paracentral              | 0.0709597  | 0.7899445 | 1  |
| R_parsopercularis          | 0.9496323  | 0.3298129 | 1  |

<sup>a</sup> Uncorrected p-values. All results were non-significant (all pFDR >.05) after FDR correction.

| Region                     | Q         | pvalue    | df |
|----------------------------|-----------|-----------|----|
| R_parsorbitalis            | 2.2656379 | 0.1322717 | 1  |
| R_parstriangularis         | 0.1007702 | 0.7509073 | 1  |
| R_pericalcarine            | 0.6426488 | 0.4227533 | 1  |
| R_postcentral              | 0.5802581 | 0.4462112 | 1  |
| R_posteriorcingulate       | 6.7674999 | 0.0092833 | 1  |
| R_precentral               | 0.0011865 | 0.9725223 | 1  |
| R_precuneus                | 0.2293018 | 0.6320420 | 1  |
| R_rostralanteriorcingulate | 0.2940208 | 0.5876554 | 1  |
| R_rostralmiddlefrontal     | 3.2650897 | 0.0707692 | 1  |
| R_superiorfrontal          | 0.3575370 | 0.5498773 | 1  |
| R_superiorparietal         | 0.1896814 | 0.6631819 | 1  |
| R_superiortemporal         | 0.0927115 | 0.7607580 | 1  |
| R_supramarginal            | 0.6270878 | 0.4284255 | 1  |
| R_frontalpole              | 0.0470704 | 0.8282418 | 1  |
| R_temporalpole             | 0.3282038 | 0.5667187 | 1  |
| R_transversetemporal       | 0.0315378 | 0.8590459 | 1  |
| R_insula                   | 0.0007913 | 0.9775582 | 1  |
| LThickness                 | 0.0846771 | 0.7710564 | 1  |
| RThickness                 | 0.1418164 | 0.7064819 | 1  |
| LFullSurf                  | 0.0004285 | 0.9834853 | 1  |
| RFullSurf                  | 0.1010385 | 0.7505869 | 1  |

<sup>a</sup> Uncorrected p-values. All results were non-significant (all pFDR >.05) after FDR correction.

Table S17: Cortical Thickness Continuous Model

| Region                    | N    | Effect Size (r) | SE    | Lower CI | Upper CI | tau <sup>2</sup> | I <sup>2</sup> | H <sup>2</sup> | pvalue | FDRp  |
|---------------------------|------|-----------------|-------|----------|----------|------------------|----------------|----------------|--------|-------|
| L_bankssts                | 2746 | 0.019           | 0.031 | -0.041   | 0.079    | 0.012            | 54.381         | 2.192          | 0.5310 | 0.981 |
| L_caudalanteriorcingulate | 2884 | 0.019           | 0.019 | -0.018   | 0.055    | 0.000            | 0.000          | 1.000          | 0.3090 | 0.910 |
| L_caudalmiddlefrontal     | 2886 | 0.007           | 0.034 | -0.060   | 0.073    | 0.018            | 65.196         | 2.873          | 0.8400 | 0.981 |
| L_cuneus                  | 2777 | 0.002           | 0.023 | -0.044   | 0.048    | 0.003            | 24.046         | 1.317          | 0.9360 | 0.981 |
| L_entorhinal              | 2755 | -0.019          | 0.019 | -0.057   | 0.018    | 0.000            | 0.000          | 1.000          | 0.3080 | 0.910 |
| L_fusiform                | 2870 | -0.038          | 0.020 | -0.078   | 0.002    | 0.001            | 9.521          | 1.105          | 0.0620 | 0.555 |
| L_inferiorparietal        | 2828 | -0.004          | 0.019 | -0.041   | 0.033    | 0.000            | 0.000          | 1.000          | 0.8360 | 0.981 |
| L_inferiortemporal        | 2843 | -0.003          | 0.019 | -0.039   | 0.034    | 0.000            | 0.000          | 1.000          | 0.8840 | 0.981 |

| Region                     | N    | Effect Size (r) | SE    | Lower CI | Upper CI | tau <sup>2</sup> | I <sup>2</sup> | H <sup>2</sup> | pvalue | FDRp  |
|----------------------------|------|-----------------|-------|----------|----------|------------------|----------------|----------------|--------|-------|
| L_isthmuscingulate         | 2898 | -0.023          | 0.028 | -0.077   | 0.032    | 0.009            | 47.412         | 1.902          | 0.4140 | 0.981 |
| L_lateraloccipital         | 2866 | 0.035           | 0.023 | -0.010   | 0.080    | 0.003            | 23.738         | 1.311          | 0.1240 | 0.844 |
| L_lateralorbitofrontal     | 2873 | 0.006           | 0.024 | -0.042   | 0.054    | 0.005            | 31.913         | 1.469          | 0.8020 | 0.981 |
| L_lingual                  | 2842 | -0.013          | 0.019 | -0.050   | 0.024    | 0.000            | 1.786          | 1.018          | 0.4870 | 0.981 |
| L_medialorbitofrontal      | 2862 | 0.057           | 0.020 | 0.018    | 0.096    | 0.001            | 8.255          | 1.090          | 0.0040 | 0.120 |
| L_middletemporal           | 2756 | -0.002          | 0.030 | -0.061   | 0.057    | 0.011            | 52.553         | 2.108          | 0.9430 | 0.981 |
| L parahippocampal          | 2888 | 0.012           | 0.028 | -0.042   | 0.066    | 0.008            | 45.968         | 1.851          | 0.6580 | 0.981 |
| L_paracentral              | 2897 | -0.046          | 0.022 | -0.089   | -0.003   | 0.002            | 19.606         | 1.244          | 0.0350 | 0.477 |
| L_parsopercularis          | 2875 | -0.012          | 0.019 | -0.048   | 0.025    | 0.000            | 0.000          | 1.000          | 0.5280 | 0.981 |
| L_parsorbitalis            | 2885 | 0.010           | 0.019 | -0.026   | 0.046    | 0.000            | 0.000          | 1.000          | 0.5910 | 0.981 |
| L_parstriangularis         | 2873 | -0.012          | 0.032 | -0.075   | 0.051    | 0.015            | 60.455         | 2.529          | 0.7160 | 0.981 |
| L_pericalcarine            | 2811 | -0.019          | 0.026 | -0.070   | 0.032    | 0.006            | 37.466         | 1.599          | 0.4700 | 0.981 |
| L_postcentral              | 2838 | -0.004          | 0.022 | -0.047   | 0.039    | 0.002            | 17.479         | 1.212          | 0.8610 | 0.981 |
| L_posteriorcingulate       | 2896 | 0.027           | 0.018 | -0.009   | 0.064    | 0.000            | 0.000          | 1.000          | 0.1400 | 0.844 |
| L_precentral               | 2855 | -0.010          | 0.019 | -0.046   | 0.027    | 0.000            | 0.000          | 1.000          | 0.5920 | 0.981 |
| L_precuneus                | 2887 | 0.001           | 0.022 | -0.042   | 0.044    | 0.002            | 18.010         | 1.220          | 0.9570 | 0.981 |
| L_rostralanteriorcingulate | 2875 | 0.036           | 0.019 | -0.001   | 0.072    | 0.000            | 0.000          | 1.000          | 0.0550 | 0.555 |
| L_rostralmiddlefrontal     | 2886 | 0.004           | 0.020 | -0.036   | 0.043    | 0.001            | 9.134          | 1.101          | 0.8460 | 0.981 |
| L_superiorfrontal          | 2879 | -0.003          | 0.019 | -0.039   | 0.033    | 0.000            | 0.000          | 1.000          | 0.8720 | 0.981 |
| L_superiorparietal         | 2851 | -0.019          | 0.020 | -0.058   | 0.019    | 0.001            | 4.898          | 1.052          | 0.3200 | 0.910 |
| L_superiortemporal         | 2733 | 0.001           | 0.027 | -0.053   | 0.054    | 0.008            | 42.226         | 1.731          | 0.9790 | 0.981 |
| L_supramarginal            | 2775 | -0.022          | 0.021 | -0.063   | 0.020    | 0.001            | 12.048         | 1.137          | 0.3060 | 0.910 |
| L_frontalpole              | 2902 | 0.046           | 0.020 | 0.007    | 0.084    | 0.001            | 7.506          | 1.081          | 0.0210 | 0.382 |
| L_temporalpole             | 2864 | 0.019           | 0.019 | -0.018   | 0.055    | 0.000            | 0.000          | 1.000          | 0.3140 | 0.910 |
| L_transversetemporal       | 2903 | 0.035           | 0.018 | -0.001   | 0.071    | 0.000            | 0.000          | 1.000          | 0.0600 | 0.555 |
| L_insula                   | 2829 | -0.002          | 0.022 | -0.045   | 0.041    | 0.002            | 18.872         | 1.233          | 0.9280 | 0.981 |
| R_bankssts                 | 2840 | 0.034           | 0.031 | -0.027   | 0.096    | 0.014            | 58.338         | 2.400          | 0.2740 | 0.910 |
| R_caudalanteriorcingulate  | 2897 | 0.025           | 0.026 | -0.026   | 0.077    | 0.007            | 40.506         | 1.681          | 0.3320 | 0.919 |
| R_caudalmiddlefrontal      | 2884 | 0.003           | 0.019 | -0.033   | 0.039    | 0.000            | 0.000          | 1.000          | 0.8690 | 0.981 |
| R_cuneus                   | 2793 | 0.004           | 0.019 | -0.033   | 0.041    | 0.000            | 0.000          | 1.000          | 0.8420 | 0.981 |
| R_entorhinal               | 2695 | 0.007           | 0.020 | -0.032   | 0.046    | 0.001            | 4.544          | 1.048          | 0.7350 | 0.981 |
| R_fusiform                 | 2877 | -0.001          | 0.024 | -0.047   | 0.045    | 0.004            | 27.295         | 1.375          | 0.9730 | 0.981 |
| R_inferiorparietal         | 2828 | 0.024           | 0.028 | -0.031   | 0.079    | 0.009            | 46.709         | 1.876          | 0.4000 | 0.981 |
| R_inferiortemporal         | 2855 | -0.026          | 0.025 | -0.076   | 0.023    | 0.006            | 35.851         | 1.559          | 0.2980 | 0.910 |

| Region                     | N    | Effect Size (r) | SE    | Lower CI | Upper CI | tau <sup>2</sup> | I <sup>2</sup> | H <sup>2</sup> | pvalue | FDRp  |
|----------------------------|------|-----------------|-------|----------|----------|------------------|----------------|----------------|--------|-------|
| R_isthmuscingulate         | 2890 | -0.039          | 0.026 | -0.091   | 0.013    | 0.007            | 41.837         | 1.719          | 0.1370 | 0.844 |
| R_lateraloccipital         | 2868 | 0.009           | 0.030 | -0.050   | 0.069    | 0.012            | 55.610         | 2.253          | 0.7570 | 0.981 |
| R_lateralorbitofrontal     | 2853 | 0.005           | 0.031 | -0.055   | 0.065    | 0.013            | 55.888         | 2.267          | 0.8810 | 0.981 |
| R_lingual                  | 2843 | -0.019          | 0.028 | -0.075   | 0.036    | 0.009            | 48.214         | 1.931          | 0.4960 | 0.981 |
| R_medialorbitofrontal      | 2847 | 0.067           | 0.019 | 0.031    | 0.103    | 0.000            | 0.000          | 1.000          | 0.0001 | 0.017 |
| R_middletemporal           | 2832 | 0.031           | 0.031 | -0.030   | 0.092    | 0.013            | 57.434         | 2.349          | 0.3170 | 0.910 |
| R parahippocampal          | 2897 | -0.003          | 0.023 | -0.048   | 0.042    | 0.003            | 24.683         | 1.328          | 0.9100 | 0.981 |
| R_paracentral              | 2894 | -0.020          | 0.027 | -0.072   | 0.032    | 0.007            | 42.450         | 1.738          | 0.4490 | 0.981 |
| R_parsopercularis          | 2859 | 0.006           | 0.019 | -0.031   | 0.042    | 0.000            | 0.000          | 1.000          | 0.7670 | 0.981 |
| R_parsorbitalis            | 2882 | -0.013          | 0.029 | -0.070   | 0.044    | 0.010            | 51.293         | 2.053          | 0.6580 | 0.981 |
| R_parstriangularis         | 2853 | 0.008           | 0.019 | -0.029   | 0.044    | 0.000            | 0.000          | 1.000          | 0.6810 | 0.981 |
| R_pericalcarine            | 2795 | 0.019           | 0.028 | -0.035   | 0.074    | 0.008            | 45.088         | 1.821          | 0.4870 | 0.981 |
| R_postcentral              | 2852 | -0.017          | 0.019 | -0.053   | 0.020    | 0.000            | 0.000          | 1.000          | 0.3760 | 0.962 |
| R_posteriorcingulate       | 2900 | 0.013           | 0.027 | -0.040   | 0.065    | 0.007            | 43.111         | 1.758          | 0.6360 | 0.981 |
| R_precentral               | 2859 | -0.038          | 0.027 | -0.092   | 0.016    | 0.008            | 45.034         | 1.819          | 0.1690 | 0.910 |
| R_precuneus                | 2886 | -0.020          | 0.030 | -0.079   | 0.039    | 0.012            | 54.430         | 2.194          | 0.5040 | 0.981 |
| R_rostralanteriorcingulate | 2853 | 0.025           | 0.021 | -0.017   | 0.067    | 0.002            | 15.669         | 1.186          | 0.2420 | 0.910 |
| R_rostralmiddlefrontal     | 2867 | -0.008          | 0.024 | -0.054   | 0.039    | 0.004            | 27.734         | 1.384          | 0.7460 | 0.981 |
| R_superiorfrontal          | 2881 | 0.013           | 0.021 | -0.029   | 0.055    | 0.002            | 15.955         | 1.190          | 0.5550 | 0.981 |
| R_superiorparietal         | 2866 | -0.016          | 0.028 | -0.071   | 0.040    | 0.009            | 48.525         | 1.943          | 0.5780 | 0.981 |
| R_superiortemporal         | 2802 | 0.024           | 0.021 | -0.017   | 0.065    | 0.001            | 11.363         | 1.128          | 0.2560 | 0.910 |
| R_supramarginal            | 2794 | 0.003           | 0.025 | -0.046   | 0.051    | 0.005            | 32.058         | 1.472          | 0.9150 | 0.981 |
| R_frontalpole              | 2894 | 0.050           | 0.018 | 0.014    | 0.086    | 0.000            | 0.000          | 1.000          | 0.0070 | 0.145 |
| R_temporalpole             | 2820 | 0.022           | 0.022 | -0.021   | 0.065    | 0.002            | 17.066         | 1.206          | 0.3100 | 0.910 |
| R_transversetemporal       | 2905 | 0.012           | 0.024 | -0.034   | 0.058    | 0.004            | 27.716         | 1.383          | 0.6070 | 0.981 |
| R_insula                   | 2797 | -0.013          | 0.023 | -0.058   | 0.031    | 0.003            | 20.723         | 1.261          | 0.5540 | 0.981 |
| LThickness                 | 2907 | -0.016          | 0.019 | -0.053   | 0.020    | 0.000            | 0.000          | 1.000          | 0.3830 | 0.962 |
| RThickness                 | 2907 | 0.010           | 0.019 | -0.026   | 0.046    | 0.000            | 0.000          | 1.000          | 0.5890 | 0.981 |

Table S18: Cortical Surface Area Continuous Model

| Region                    | N    | Effect Size (r) | SE    | Lower CI | Upper CI | tau <sup>2</sup> | I <sup>2</sup> | H <sup>2</sup> | pvalue | FDRp  |
|---------------------------|------|-----------------|-------|----------|----------|------------------|----------------|----------------|--------|-------|
| L_bankssts                | 2707 | 0.009           | 0.021 | -0.032   | 0.050    | 0.001            | 8.943          | 1.098          | 0.672  | 0.905 |
| L_caudalanteriorcingulate | 2845 | -0.006          | 0.021 | -0.047   | 0.035    | 0.001            | 12.394         | 1.141          | 0.780  | 0.980 |



| Region                     | N    | Effect Size (r) | SE    | Lower CI | Upper CI | tau <sup>2</sup> | I <sup>2</sup> | H <sup>2</sup> | pvalue | FDRp  |
|----------------------------|------|-----------------|-------|----------|----------|------------------|----------------|----------------|--------|-------|
| L_caudalmiddlefrontal      | 2848 | -0.006          | 0.019 | -0.044   | 0.032    | 0.000            | 4.217          | 1.044          | 0.761  | 0.967 |
| L_cuneus                   | 2738 | -0.013          | 0.019 | -0.050   | 0.025    | 0.000            | 0.000          | 1.000          | 0.509  | 0.859 |
| L_entorhinal               | 2716 | -0.027          | 0.022 | -0.070   | 0.016    | 0.002            | 15.371         | 1.182          | 0.217  | 0.856 |
| L_fusiform                 | 2831 | -0.043          | 0.021 | -0.084   | -0.002   | 0.001            | 11.497         | 1.130          | 0.038  | 0.827 |
| L_inferiorparietal         | 2790 | -0.013          | 0.022 | -0.056   | 0.030    | 0.002            | 17.472         | 1.212          | 0.552  | 0.882 |
| L_inferiortemporal         | 2804 | -0.002          | 0.024 | -0.049   | 0.044    | 0.004            | 27.412         | 1.378          | 0.922  | 0.981 |
| L_isthmuscingulate         | 2859 | 0.012           | 0.019 | -0.025   | 0.048    | 0.000            | 0.000          | 1.000          | 0.529  | 0.879 |
| L_lateraloccipital         | 2827 | -0.027          | 0.021 | -0.067   | 0.014    | 0.001            | 10.670         | 1.119          | 0.195  | 0.856 |
| L_lateralorbitofrontal     | 2834 | 0.007           | 0.019 | -0.030   | 0.043    | 0.000            | 0.000          | 1.000          | 0.716  | 0.932 |
| L_lingual                  | 2803 | 0.001           | 0.025 | -0.048   | 0.050    | 0.005            | 33.945         | 1.514          | 0.964  | 0.981 |
| L_medialorbitofrontal      | 2823 | -0.037          | 0.034 | -0.103   | 0.029    | 0.018            | 64.449         | 2.813          | 0.274  | 0.856 |
| L_middletemporal           | 2717 | 0.027           | 0.019 | -0.010   | 0.065    | 0.000            | 0.911          | 1.009          | 0.156  | 0.856 |
| L parahippocampal          | 2848 | -0.056          | 0.020 | -0.096   | -0.016   | 0.001            | 9.139          | 1.101          | 0.006  | 0.205 |
| L_paracentral              | 2858 | 0.019           | 0.028 | -0.036   | 0.075    | 0.009            | 48.056         | 1.925          | 0.494  | 0.856 |
| L_parsopercularis          | 2836 | 0.013           | 0.019 | -0.024   | 0.050    | 0.000            | 0.000          | 1.000          | 0.486  | 0.856 |
| L_parsorbitalis            | 2846 | 0.012           | 0.023 | -0.033   | 0.057    | 0.003            | 23.378         | 1.305          | 0.605  | 0.905 |
| L_parstriangularis         | 2834 | -0.022          | 0.022 | -0.066   | 0.022    | 0.003            | 19.970         | 1.250          | 0.322  | 0.856 |
| L_pericalcarine            | 2772 | -0.015          | 0.021 | -0.055   | 0.026    | 0.001            | 9.724          | 1.108          | 0.482  | 0.856 |
| L_postcentral              | 2800 | 0.039           | 0.025 | -0.010   | 0.087    | 0.005            | 32.277         | 1.477          | 0.120  | 0.856 |
| L_posteriorcingulate       | 2855 | 0.026           | 0.019 | -0.011   | 0.063    | 0.000            | 0.000          | 1.000          | 0.165  | 0.856 |
| L_precentral               | 2816 | -0.009          | 0.022 | -0.053   | 0.035    | 0.003            | 19.958         | 1.249          | 0.675  | 0.905 |
| L_precuneus                | 2848 | 0.002           | 0.035 | -0.066   | 0.071    | 0.020            | 67.255         | 3.054          | 0.948  | 0.981 |
| L_rostralanteriorcingulate | 2836 | -0.021          | 0.023 | -0.066   | 0.024    | 0.003            | 23.790         | 1.312          | 0.358  | 0.856 |
| L_rostralmiddlefrontal     | 2847 | 0.021           | 0.019 | -0.016   | 0.058    | 0.000            | 0.000          | 1.000          | 0.260  | 0.856 |
| L_superiorfrontal          | 2840 | 0.005           | 0.037 | -0.067   | 0.077    | 0.024            | 70.694         | 3.412          | 0.898  | 0.981 |
| L_superiorparietal         | 2812 | 0.018           | 0.026 | -0.032   | 0.068    | 0.006            | 35.764         | 1.557          | 0.478  | 0.856 |
| L_superiortemporal         | 2695 | 0.006           | 0.023 | -0.040   | 0.051    | 0.003            | 21.758         | 1.278          | 0.805  | 0.981 |
| L_supramarginal            | 2737 | 0.048           | 0.032 | -0.014   | 0.110    | 0.014            | 57.169         | 2.335          | 0.129  | 0.856 |
| L_frontalpole              | 2863 | -0.011          | 0.022 | -0.053   | 0.032    | 0.002            | 17.213         | 1.208          | 0.625  | 0.905 |
| L_temporalpole             | 2824 | -0.033          | 0.025 | -0.081   | 0.015    | 0.005            | 31.502         | 1.460          | 0.180  | 0.856 |
| L_transversetemporal       | 2864 | -0.018          | 0.020 | -0.057   | 0.021    | 0.001            | 8.165          | 1.089          | 0.367  | 0.856 |
| L_insula                   | 2790 | -0.013          | 0.019 | -0.050   | 0.024    | 0.000            | 0.000          | 1.000          | 0.476  | 0.856 |
| R_bankssts                 | 2801 | 0.019           | 0.027 | -0.034   | 0.071    | 0.007            | 41.195         | 1.701          | 0.489  | 0.856 |
| R_caudalanteriorcingulate  | 2857 | -0.018          | 0.022 | -0.061   | 0.026    | 0.002            | 19.412         | 1.241          | 0.420  | 0.856 |

| Region                     | N    | Effect Size (r) | SE    | Lower CI | Upper CI | tau <sup>2</sup> | I <sup>2</sup> | H <sup>2</sup> | pvalue | FDRp  |
|----------------------------|------|-----------------|-------|----------|----------|------------------|----------------|----------------|--------|-------|
| R_caudalmiddlefrontal      | 2845 | -0.026          | 0.019 | -0.062   | 0.011    | 0.000            | 0.000          | 1.000          | 0.169  | 0.856 |
| R_cuneus                   | 2754 | -0.015          | 0.019 | -0.052   | 0.022    | 0.000            | 0.000          | 1.000          | 0.419  | 0.856 |
| R_entorhinal               | 2654 | -0.036          | 0.025 | -0.085   | 0.013    | 0.005            | 29.647         | 1.421          | 0.152  | 0.856 |
| R_fusiform                 | 2838 | 0.003           | 0.022 | -0.041   | 0.046    | 0.002            | 18.627         | 1.229          | 0.900  | 0.981 |
| R_inferiorparietal         | 2791 | 0.010           | 0.021 | -0.032   | 0.052    | 0.002            | 14.208         | 1.166          | 0.648  | 0.905 |
| R_inferiortemporal         | 2816 | -0.002          | 0.025 | -0.051   | 0.048    | 0.006            | 35.360         | 1.547          | 0.952  | 0.981 |
| R_isthmuscingulate         | 2850 | 0.027           | 0.024 | -0.021   | 0.075    | 0.004            | 30.620         | 1.441          | 0.268  | 0.856 |
| R_lateraloccipital         | 2829 | -0.003          | 0.029 | -0.059   | 0.053    | 0.010            | 49.222         | 1.969          | 0.921  | 0.981 |
| R_lateralorbitofrontal     | 2814 | -0.009          | 0.023 | -0.055   | 0.036    | 0.003            | 24.657         | 1.327          | 0.687  | 0.905 |
| R_lingual                  | 2804 | -0.008          | 0.019 | -0.045   | 0.029    | 0.000            | 0.000          | 1.000          | 0.678  | 0.905 |
| R_medialorbitofrontal      | 2808 | -0.062          | 0.032 | -0.124   | 0.000    | 0.014            | 58.977         | 2.438          | 0.051  | 0.856 |
| R_middletemporal           | 2795 | 0.000           | 0.019 | -0.037   | 0.036    | 0.000            | 0.000          | 1.000          | 0.981  | 0.981 |
| R parahippocampal          | 2858 | -0.001          | 0.022 | -0.044   | 0.041    | 0.002            | 17.058         | 1.206          | 0.952  | 0.981 |
| R_paracentral              | 2855 | -0.005          | 0.024 | -0.052   | 0.043    | 0.004            | 30.618         | 1.441          | 0.842  | 0.981 |
| R_parsopercularis          | 2820 | 0.017           | 0.019 | -0.020   | 0.053    | 0.000            | 0.000          | 1.000          | 0.376  | 0.856 |
| R_parsorbitalis            | 2843 | -0.028          | 0.028 | -0.083   | 0.027    | 0.009            | 47.357         | 1.900          | 0.321  | 0.856 |
| R_parstriangularis         | 2814 | -0.002          | 0.019 | -0.039   | 0.035    | 0.000            | 0.000          | 1.000          | 0.918  | 0.981 |
| R_pericalcarine            | 2756 | -0.033          | 0.019 | -0.071   | 0.004    | 0.000            | 0.000          | 1.000          | 0.078  | 0.856 |
| R_postcentral              | 2814 | 0.035           | 0.022 | -0.009   | 0.078    | 0.002            | 19.102         | 1.236          | 0.120  | 0.856 |
| R_posteriorcingulate       | 2859 | -0.001          | 0.025 | -0.049   | 0.048    | 0.005            | 32.457         | 1.481          | 0.976  | 0.981 |
| R_precentral               | 2820 | -0.001          | 0.019 | -0.037   | 0.036    | 0.000            | 0.000          | 1.000          | 0.977  | 0.981 |
| R_precuneus                | 2847 | 0.040           | 0.032 | -0.023   | 0.104    | 0.016            | 61.102         | 2.571          | 0.214  | 0.856 |
| R_rostralanteriorcingulate | 2814 | -0.009          | 0.019 | -0.046   | 0.027    | 0.000            | 0.000          | 1.000          | 0.616  | 0.905 |
| R_rostralmiddlefrontal     | 2828 | 0.023           | 0.021 | -0.018   | 0.064    | 0.001            | 11.952         | 1.136          | 0.278  | 0.856 |
| R_superiorfrontal          | 2842 | -0.005          | 0.022 | -0.047   | 0.038    | 0.002            | 16.903         | 1.203          | 0.828  | 0.981 |
| R_superiorparietal         | 2827 | 0.025           | 0.024 | -0.023   | 0.072    | 0.005            | 30.749         | 1.444          | 0.317  | 0.856 |
| R_superiortemporal         | 2763 | 0.029           | 0.030 | -0.030   | 0.087    | 0.011            | 52.633         | 2.111          | 0.338  | 0.856 |
| R_supramarginal            | 2756 | -0.009          | 0.029 | -0.066   | 0.048    | 0.010            | 49.241         | 1.970          | 0.749  | 0.963 |
| R_frontalpole              | 2854 | 0.021           | 0.021 | -0.020   | 0.063    | 0.002            | 14.926         | 1.175          | 0.314  | 0.856 |
| R_temporalpole             | 2781 | -0.014          | 0.019 | -0.051   | 0.023    | 0.000            | 0.000          | 1.000          | 0.465  | 0.856 |
| R_transversetemporal       | 2866 | -0.011          | 0.019 | -0.047   | 0.025    | 0.000            | 0.000          | 1.000          | 0.551  | 0.882 |
| R_insula                   | 2758 | -0.003          | 0.021 | -0.043   | 0.038    | 0.001            | 9.129          | 1.100          | 0.892  | 0.981 |
| LSurfArea                  | 2868 | -0.014          | 0.020 | -0.052   | 0.025    | 0.001            | 5.627          | 1.060          | 0.487  | 0.856 |
| RSurfArea                  | 2868 | 0.014           | 0.020 | -0.025   | 0.052    | 0.001            | 5.627          | 1.060          | 0.487  | 0.856 |

Table S19: Subcortical Correlation Model

| Region   | N    | Effect Size (r) | SE    | Lower CI | Upper CI | tau <sup>2</sup> | I <sup>2</sup> | H <sup>2</sup> | pvalue | FDRp  |
|----------|------|-----------------|-------|----------|----------|------------------|----------------|----------------|--------|-------|
| LLatVent | 2990 | 0.002           | 0.023 | -0.043   | 0.046    | 0.003            | 24.698         | 1.328          | 0.939  | 0.985 |
| RLatVent | 2990 | 0.001           | 0.019 | -0.036   | 0.039    | 0.001            | 6.043          | 1.064          | 0.944  | 0.985 |
| Lthal    | 2966 | 0.007           | 0.030 | -0.051   | 0.066    | 0.012            | 55.391         | 2.242          | 0.806  | 0.967 |
| Lcaud    | 2981 | 0.017           | 0.024 | -0.029   | 0.064    | 0.004            | 29.879         | 1.426          | 0.460  | 0.923 |
| Lput     | 2934 | -0.012          | 0.018 | -0.048   | 0.024    | 0.000            | 0.000          | 1.000          | 0.522  | 0.923 |
| Lpal     | 2762 | -0.023          | 0.019 | -0.060   | 0.014    | 0.000            | 0.000          | 1.000          | 0.226  | 0.923 |
| Lhippo   | 2970 | 0.014           | 0.018 | -0.022   | 0.050    | 0.000            | 0.000          | 1.000          | 0.443  | 0.923 |
| Lamyg    | 2972 | 0.010           | 0.018 | -0.026   | 0.045    | 0.000            | 0.000          | 1.000          | 0.601  | 0.923 |
| Laccumb  | 2965 | 0.012           | 0.020 | -0.027   | 0.052    | 0.001            | 10.789         | 1.121          | 0.547  | 0.923 |
| Rthal    | 2986 | 0.014           | 0.031 | -0.047   | 0.075    | 0.014            | 59.948         | 2.497          | 0.654  | 0.923 |
| Rcaud    | 2982 | 0.013           | 0.027 | -0.039   | 0.065    | 0.007            | 43.636         | 1.774          | 0.625  | 0.923 |
| Rput     | 2965 | 0.000           | 0.018 | -0.036   | 0.036    | 0.000            | 0.000          | 1.000          | 0.985  | 0.985 |
| Rpal     | 2970 | -0.032          | 0.018 | -0.067   | 0.004    | 0.000            | 0.000          | 1.000          | 0.084  | 0.923 |
| Rhippo   | 2978 | 0.022           | 0.018 | -0.014   | 0.058    | 0.000            | 0.000          | 1.000          | 0.229  | 0.923 |
| Ramyg    | 2960 | 0.019           | 0.024 | -0.029   | 0.067    | 0.005            | 33.861         | 1.512          | 0.444  | 0.923 |
| Raccumb  | 2963 | 0.020           | 0.023 | -0.025   | 0.064    | 0.003            | 24.514         | 1.325          | 0.388  | 0.923 |

## Funding and Acknowledgments

MK acknowledges support from the National Bank Fellowship (McGill University) and the Swiss National Foundation (P2SKP3\_178175). GM was supported by a Sir Henry Dale Fellowship jointly funded by the Wellcome Trust and the Royal Society (grant number 202397/Z/16/Z). MG was supported by NHMRC as an R.D. Wright Biomedical Career Development Fellow (#1061875). CP was supported by NHMRC Senior Principal Research Fellowships (#628386 & #1105825) and a NHMRC Program Grant (ID: 1150083). AF was supported by the Sylvia and Charles Viertel Charitable Foundation; and the National Health and Medical Research Council (ID: 1050504). MAB is supported by a Senior Research Fellowship from the Australian National Health and Medical Research Council (NHMRC). AK was supported by the German Research Foundation (KR 3822/5-1, KR 3822/7-2). YW was supported by the National Natural Science Foundation of China (31871114), CAS Key Laboratory of Mental Health, Institute of Psychology. ET was supported by the German Research Foundation (DFG 31/2-1). TK was funded by the German Research Foundation (DFG FOR2107 KI588/14-1 and KI588/14-2). IL was funded by RBRF (20-013-00748). SL acknowledges funding from Fonds de la Recherche du Québec – Santé (FRQ-S) and the Canadian Institutes of Health Research (CIHR). PK was funded by a University of Roehampton Vice Chancellor Scholarship. SK was funded by the Swiss National Science Foundation. IN was funded by the DFG: FOR2107, FSU Jena: Junior Scientist Programme, UKGM: FoFoe. MD was funded by the Schweizerischer Nationalfonds zur Förderung der Wissenschaftlichen Forschung (Grant/Award Number: 100019\_159440). PD was supported by the National Institute of Mental Health (NIMH R00 MH086756; NIMH P50 MH080173). WR was funded by Collegium Helveticum, Transdisciplinary Research Institute of ETH Zurich and University Zurich. MJG was supported by National Health and Medical Research Council (NHMRC) Project Grants 630471 and 1081603. AD was supported by the Canadian Institutes of Health Research. JT was supported by the NIMH (5R01MH116147 (PI P. Thompson)). BB was funded by the Canada Research Chairs Program.

FOR2107: This work was funded by the German Research Foundation (DFG, grant FOR2107 DA1151/5-1 and DA1151/5-2 to UD; SFB-TRR58, Projects C09 and Z02 to UD) and the Interdisciplinary Center for Clinical Research (IZKF) of the medical faculty of Münster (grant Dan3/012/17 to UD).

DECOP: This study was funded by the Netherland Organization for Scientific Research (NWO) [Veni #451-13-035].

ASRB: The Australian Schizophrenia Research Bank (ASRB) was supported by the National Health and Medical Research Council of Australia (NHMRC) (Enabling Grant, ID 386500), the Pratt Foundation, Ramsay Health Care, the Viertel Charitable Foundation and the Schizophrenia Research Institute. Chief Investigators for ASRB were Carr, V., Schall, U., Scott, R., Jablensky, A., Mowry, B., Michie, P., Catts, S., Henskens, F., Pantelis, C. We thank Loughland, C., the ASRB Manager, and acknowledge the help of Jason Bridge for ASRB database queries.

IGP: This study was funded by Project Grants from the Australian National Health and Medical Research Council of Australia (NHMRC; APP630471 and APP1081603), the Macquarie University's Australian Research Council Centre of Excellence in Cognition and its Disorders (CE110001021).

London1a: This work was supported by a Brain & Behavior Research Foundation NARSAD Young Investigator Grant to GM (#21200, Lieber Investigator).

London1b: Funding for this study was provided by European Science Foundation EURYI grant (NWO 044035001 to AA).

AUCK: This study was funded by the Faculty Research Development Fund (No. 3702215) and the MRI Pilot Study Fund (Skyra 25- 001-A) from the University of Auckland.

CAM: This work was supported by the Wellcome Trust (to PM and WS) and the Niels Stensen Foundation (to KMJD).
